# Supplementary material
Source: PubMed Central journal article supplement (PMC10346510)
Supplement: jamaophthalmol-e232855-s001.pdf [file jamaophthalmol-e232855-s001.pdf]

1  
2  
3  
4  
5  
6  
7  
8  
9  
10  
11  
12  
13  
14  
15

**MYOPIA TREATMENT STUDY  
(MTS1)**

**Low-Dose Atropine for Treatment of Myopia**

**PROTOCOL**

**Protocol Identifying Number: MTS1**

**IND Sponsor: Jaeb Center for Health Research, Inc.**

**Version Number: v5.1**

**April 6, 2020**

16 **PROTOCOL AMENDMENT IV (24 Mar 2020)**

17  
18 This amendment provides for the following protocol changes:  
19

20 **Protocol Change # 1**

21  
22 Original Protocol

23 Office visits are conducted at 6, 12, and 18-months post-randomization.  
24

25 Protocol Change

26 A virtual visit may be completed at 6, 12, or 18-months in the event that an in-person office visit  
27 cannot be completed by the participant. Data collected during a virtual visit are a subset of the  
28 data that are collected at an in-office visit (summarized in section 4.9) that can be collected by  
29 means of a phone call, or other smartphone or computer based video/audio method of  
30 communication such as teleconferencing.  
31

32 Rationale for Change and Impact on Study Design

33 Due to the coronavirus (COVID-19) pandemic, participating clinical centers may be unable to  
34 see research participants for in-office study visits in the coming months. The protocol is being  
35 amended to allow for a virtual visit to be completed at 6, 12, or 18-months instead of an office  
36 visit. Given that these visits are prior to the 24-month primary outcome visit, the overall  
37 scientific integrity of the study is maintained.  
38

39 Effect of Change on Informed Consent Form and Study Participants

40 No changes are needed to the current informed consent or assent forms. The data collected by  
41 virtual visit are a subset of the data that would be collected at an in-office visit already described  
42 in the consent form.  
43

44 **Protocol Change # 2**

45  
46 Original Protocol

47 Females who have experienced menarche will undergo a urine pregnancy test at each follow up  
48 visit after randomization. Study medication will be discontinued if the test result is positive.  
49

50 Protocol Change

51 A pregnancy test will be performed at home if an office visit cannot be completed. Pregnancy  
52 testing is being omitted at the 30-month visit which occurs 6 months after study medication has  
53 been discontinued.  
54

55 Rationale for Change and Impact on Study Design

56 Female participants who have experienced menarche must not be pregnant to continue on study  
57 medication. The protocol has been revised to require a pregnancy test to be performed at home  
58 instead of in the office if an in-person office visit cannot be completed by the participant.  
59

60 Effect of Change on Informed Consent Form and Study Participants

61 No changes are needed to the current informed consent form as the form states that pregnancy  
62 tests are required at 6, 12, and 18-months for females who have experienced menarche.  
63

64 **PROTOCOL AMENDMENT III (25 Feb 2019)**

65  
66 This amendment provides for the following protocol changes:

67  
68 **Protocol Change #1**

69  
70 Original Protocol

71 Potential participants with systemic diseases, the specified eye abnormalities, or the inability to  
72 perform study testing were not explicitly excluded from the study.

73  
74 Protocol Change

75 The following items have been added as exclusion criteria in section 2.2.:

- 76 • Diseases known to affect accommodation, vergence, or ocular motility (e.g., multiple  
77 sclerosis, Grave's disease, myasthenia gravis, diabetes mellitus, Parkinson's disease)
- 78 • Existing ocular conditions (e.g., retinal disease, cataracts, ptosis) or  
79 systemic/neurodevelopmental conditions (e.g., Down syndrome) which may influence  
80 refractive development.
- 81 • Any condition that in the judgement of the investigator could potentially influence  
82 refractive development.
- 83 • Existing conditions that may affect the long-term health of the eye or require regular  
84 pharmacologic treatment that may adversely interact with study medication (e.g., JIA,  
85 glaucoma, diabetes mellitus, pre-diabetes).
- 86 • Inability to comprehend and/or perform any study-related clinical tests.

87  
88 Rationale for Change

89 The reasons for excluding certain diseases and/or conditions are specified in the criteria to aid  
90 investigators in understanding the exclusions. The inability to comprehend and/or perform any  
91 study-related clinical tests by a potential participant would prevent the study from collecting  
92 necessary valid and complete data.

93  
94 **Protocol Change #2**

95  
96 Original Protocol

97 Section 4.1 includes the following two statements:

- 98 • A central pharmacy will *compound* the atropine and placebo eyedrops based on a participant-  
99 specific treatment group and will package them in identical single-use ampules to maintain  
100 masking.
- 101 • The atropine eyedrops will consist of 0.01% atropine. The placebo eyedrops will consist of  
102 0.5% hydroxypropol methylcellulose and 1:10,000 benzalkonium chloride.

103  
104 Protocol Change

105 A separate section 4.1 has been added to better describe Study Medication.

106  
107 Nevakar is manufacturing the study drug (0.01% atropine) and placebo and packaging both in  
108 identical-appearing single-use ampules. In addition to 0.01% atropine, the ampules contain a  
109 buffer similar to artificial tears while the placebo contains just the buffer similar to artificial  
110 tears. The atropine and placebo ampules are sent to a central pharmacy, which will label and

111 package multiple atropine or placebo ampules into three month supply packages to maintain  
112 masking. The packages of ampules will be shipped to participating sites in insulated shipping  
113 boxes designed to maintain study drug at 59 to 77 degrees F during shipping. Participating sites  
114 will store study drug at room temperature (between 68 and 77 degrees F) prior to dispensing  
115 study medication packages to study participants. Additional study medication details are  
116 summarized within a separate investigational product manual.

117  
118 Rationale for Change

119 The terms “compound” and “1:10,000 benzalkonium chloride” were inadvertent holdovers from  
120 a previous draft protocol that was written when the study was expected to use a compounding  
121 pharmacy to produce the atropine eyedrops. No compounding or preservative is needed for the  
122 study medication currently manufactured in single-use ampules (monitored by US FDA) which  
123 are shipped directly from the manufacturer.

124  
125 **Protocol Change #3**

126  
127 Original Protocol

128 Section 4.3 on phone calls stated that “Two weeks following randomization ( $\pm 3$  days), the site  
129 will contact parents *to confirm receipt of study medication* and question the parent as to whether  
130 the child is experiencing any issues with treatment.”

131  
132 Protocol Change

133 The phrase “to confirm receipt of study medication” has been omitted.

134  
135 Rationale for Change

136 There is no need to confirm receipt of study medication on the 2-week phone call because study  
137 medication is handed directly to participants at their office visit at the time of randomization.  
138 The “*to confirm receipt of study medication*” wording was an inadvertent holdover from a  
139 previous draft protocol which was written when the study was expected to mail study medication  
140 to participants.

141  
142 **Protocol Change #4**

143  
144 Original Protocol

145 Although a negative urine pregnancy test is required for enrollment of any female who had  
146 reached menarche, no pregnancy testing was described during follow up.

147  
148 Protocol Change

149 A pregnancy test is now required at every post-randomization follow up visit for females who  
150 have experienced menarche.

151  
152 Rationale for Change

153 Pregnancy testing during post-randomization follow up (section 4.9) was felt necessary to  
154 enforce the existing requirement that study medication be discontinued in the event of pregnancy  
155 during the study.

156  
157 **Protocol Change #5**

158  
159 Original protocol

160 One inclusion criteria for randomization was interocular difference  $\leq 0.1$  logMAR ( $\leq 5$  letters  
161 by E-ETDRS testing).

162

163 Protocol change

164 This inclusion criteria has been changed to interocular difference  $\leq 0.2$  logMAR ( $\leq 10$  letters  
165 by E-ETDRS testing) in sections 1.11, 1.12, and 3.4.

166

167 Rationale for Change

168 The intent of the exclusion criteria for interocular difference was to exclude children with  
169 amblyopia; however, the previous interocular difference of 0.1 (5 letters) is within test-retest  
170 variability for E-ETDRS visual acuity testing. The criteria was expanded to allow enrollment of  
171 children with interocular differences up to 0.2 logMAR (10 letters), the threshold that is used to  
172 define amblyopia in several other PEDIG studies of intermittent exotropia.

173

174

175

176 **PROTOCOL AMENDMENT II (12 Jun 2018)**

177  
178 This amendment provides for the following protocol changes:  
179

180 **Protocol Change #1**

181  
182 Original Protocol

183 It was not an inclusion criterion that participants were required to have excellent compliance  
184 with spectacle correction either to be enrolled into the run-in phase or to be eligible for  
185 randomization. Participants who were not currently wearing refractive correction were eligible  
186 for the study and could have spectacle correction initiated during the run-in phase.  
187

188 Protocol Change

189 Excellent compliance with refractive correction (76% to 100% of waking hours) for at least one  
190 month will be an eligibility criterion for enrollment into the run-in phase (sections 1.11, 1.12,  
191 and 2.2). Similarly, excellent compliance with refractive correction during the run-in phase will  
192 be encouraged and will be required to be eligible for randomization (sections 1.11, 1.12, 2.5, 2.6,  
193 3.2, 3.3, and 3.4).  
194

195 Rationale for Change

196 It is not known whether spectacle compliance could interact with the effect of atropine eyedrops,  
197 but limiting the study to children who are compliant with refractive correction will guard against  
198 the possibility of having lowered statistical power for analysis should such an interaction exist.  
199 It was also felt that children who are compliant with refractive spectacle correction might also be  
200 more likely to be compliant with nightly eyedrops for two years than children who are not  
201 compliant with refractive correction. It is acknowledged that the study results will be  
202 generalizable only to children who are compliant with refractive correction.  
203

204 **Protocol Change #2**

205  
206 Original Protocol

207 The original protocol indicated that “It is the investigators’ opinion that the protocol’s level of  
208 risk falls under DHHS 46.404, which is research not involving greater than minimal risk.”  
209 (section 6.4.3)  
210

211 Protocol Change

212 The revised protocol states that “The Jaeb Center Institutional Review Board has classified the  
213 protocol as research involving greater than minimal risk using the federal definition under 45  
214 CFR 46.102i.”  
215

216 Rationale for Change

217 The protocol was assigned the risk level of “research involving greater than minimal risk” by the  
218 Jaeb Center for Health Research Institutional Review Board when it approved the protocol.  
219

220 **Protocol Change #3**

221 Original Protocol

222 Mean corneal radius was one of the biometric parameters to be measured. Three summary  
223 measurements of axial length, mean corneal radius, anterior chamber depth and lens thickness  
224 were to be taken using an optical biometer (e.g. IOLMaster, LENSTAR).  
225

#### 226 Protocol Change

227 Flat corneal radius will be measured instead of mean corneal radius because that is what both optical  
228 biometers can measure. The first summary measurement of axial length, flat corneal radius, anterior  
229 chamber depth and lens thickness will be collected, with each value based on the individual  
230 instrument's method of taking and then averaging multiple measures.  
231

#### 232 Rationale for Change

233 For corneal curvature, the only common measurement and unit of measure for the two optical  
234 biometers being used is flat corneal radius and diopter. To avoid increasing the testing burden  
235 for participants, a single measurement was deemed sufficient for these four biometric  
236 parameters.  
237

#### 238 **In addition, the following minor corrections/clarifications have been made.**

- 239
- 240 • Typos were corrected in protocol change #1 in protocol amendment I and in section 7.4.2 to  
241 reflect that near visual acuity is measured binocularly, not in each eye.  
242
  - 243 • Clarification that the *average* spherical equivalent between eyes is used for the primary  
244 analysis of myopia progression (section 1.1)  
245
  - 246 • In section 3.4 concerning eligibility for randomization, clarified that participants who do not  
247 meet eligibility criteria will be withdrawn from the study *without being randomized*.  
248
  - 249 • Clarified in section 6.4.2 that it refers to the *24-month* primary outcome in the section  
250 pertaining to participants develops adverse effects serious enough to discontinue study  
251 medication.  
252
  - 253 • The enrollment visit has been added to the list of visits that are paid for by the study (section  
254 5.4); it was originally omitted in error.  
255
  - 256 • In section 7.1.1 regarding the 24-month on-treatment primary analysis
    - 257 ○ Clarified that adjustment covariates are included to improve power for the treatment  
258 group comparison, as well as to account for potential residual confounding  
259 Clarified that baseline spherical equivalent refractive error (SER) will be included in the  
260 analysis model as an adjustment factor, while the change in SER at all follow-up visits  
261 up to and including the 24-month visit will be included in the longitudinal outcome  
262 vector. Further details, including handling of missing data, will be included in the  
263 separate Statistical Analysis Plan.  
264
  - 265 • Section 7.6 has been updated based on recent decision from the Data Safety and Monitoring  
266 Committee that evaluation of whether an interim monitoring is needed would be made after 6  
267 months of recruitment and before any outcome data are reviewed.  
268

- 269 • In Section 6.4.2, clarified that the reason for trying progressive lenses is to address adverse  
270 events related to near focusing problems.  
271
- 272 • In the statistical analysis chapter, a few minor corrections have been made to the data for two  
273 previous studies (CLEERE and ATOM2) that are cited as background data for estimating  
274 sample size (sections 7.8.2. 7.8.3). Note that none of these minor changes affected the sample  
275 size calculation.  
276
- 277 • In section 7.8.5, a few minor corrections have been made to the numbers in Table 2 on the  
278 expected width of confidence intervals on the treatment group comparisons of myopia  
279 progression in racial subgroups. None of these minor changes were substantive.  
280
- 281 • In section 7.8.1, the purpose of the general considerations for sample size section was  
282 clarified. In addition, two sentences were omitted here as they were already covered  
283 elsewhere in section 7.8.  
284
- 285 • In section 2.4, some details of the cycloplegic autorefraction and other biometry  
286 measurements have been omitted and moved to a separate manual of procedures.  
287



288  
289  
290  
291  
292  
293  
294  
295  
296  
297  
298  
299  
300  
301  
302  
303  
304  
305  
306  
307  
308  
309  
310  
311  
312  
313  
314  
315  
316  
317  
318  
319  
320  
321  
322  
323  
324  
325  
326  
327  
328  
329  
330  
331  
332  
333  
334

**PROTOCOL AMENDMENT I (11 Dec 2017)**

**This amendment provides for the following protocol change:**

**Protocol Change #1**

Original Protocol

Binocular near visual acuity will be assessed at the 6-month visit only. The analysis plan consisted of tabulating 6-month binocular near visual acuity by treatment group.

Protocol Change

Binocular near visual acuity will be assessed at both the Randomization visit and the 6-month visit (section 3.2). The analysis plan was changed to calculate the proportion of participants with loss of best corrected near vision >1 logMAR line at 6 months (sections 1.1, 1.12, and 7.4.2).

Rationale for Change

Binocular near visual acuity is an important outcome to assess the safety of low-dose atropine. In order to interpret any change in binocular near visual acuity between randomization to six months, a baseline measure is needed at the time of randomization.

**Protocol Change #2**

Original Protocol

The eye drop questionnaire will be completed at each follow up visit.

Protocol Change

The eye drop questionnaire will be completed at each follow up visit except the 30-month visit (sections 1.1.1, 1.12, 4.8, and 7.4.1).

Rationale for Change

The eye drop questionnaire is not relevant to the 30-month visit as eye drops are to be discontinued at the 24-month visit.

**Protocol Change #3**

Original Protocol

The criterion for a serious adverse event did not include a congenital anomaly/birth defect.

Protocol Change

The criterion for a serious adverse event now includes a congenital anomaly/birth defect (section 6.2).

Rationale for Change

Congenital anomalies and birth defects are part of the Food and Drug Administration definition of a serious adverse event.

## KEY ROLES

|                                          |                                                                                                                                                                                                                                                                      |
|------------------------------------------|----------------------------------------------------------------------------------------------------------------------------------------------------------------------------------------------------------------------------------------------------------------------|
| <b>JCHR Coordinating Center Director</b> |                                                                                                                                                                                                                                                                      |
| <b>Name, degree</b>                      | Raymond Kraker, M.S.P.H.                                                                                                                                                                                                                                             |
| <b>Title</b>                             | Director, PEDIG Coordinating Center                                                                                                                                                                                                                                  |
| <b>Institution Name</b>                  | Jaeb Center for Health Research<br>15310 Amberly Drive, Suite 350<br>Tampa, FL 33647<br>Phone: 1-888-797-3344<br>Fax: 1-888-697-3344<br>Email: <a href="mailto:rkraker@jaeb.org">rkraker@jaeb.org</a><br><a href="http://www.pedig.net">http://www.pedig.net</a>     |
| <b>JCHR Principal Investigator</b>       |                                                                                                                                                                                                                                                                      |
| <b>Name, degree</b>                      | Danielle Chandler, M.S.P.H.                                                                                                                                                                                                                                          |
| <b>Title</b>                             | Principal Investigator                                                                                                                                                                                                                                               |
| <b>Institution Name</b>                  | Jaeb Center for Health Research<br>15310 Amberly Drive, Suite 350<br>Tampa, FL 33647<br>Phone: 1-888-797-3344<br>Fax: 1-888-697-3344<br>Email: <a href="mailto:dchandler@jaeb.org">dchandler@jaeb.org</a><br><a href="http://www.pedig.net">http://www.pedig.net</a> |
| <b>Protocol Co-Chair</b>                 |                                                                                                                                                                                                                                                                      |
| <b>Name, degree</b>                      | Michael X. Repka, M.D.                                                                                                                                                                                                                                               |
| <b>Title</b>                             | Protocol Co-Chair                                                                                                                                                                                                                                                    |
| <b>Institution Name</b>                  | Wilmer Eye Institute<br>233 Wilmer Institute, 600 N Wolfe St<br>Baltimore, MD 21287<br>Phone: (410) 955-8314<br>Fax: (410) 955-0809<br>Email: <a href="mailto:mrepka@jhmi.edu">mrepka@jhmi.edu</a>                                                                   |
| <b>Protocol Co-Chair</b>                 |                                                                                                                                                                                                                                                                      |
| <b>Name, degree</b>                      | Katherine K. Weise, O.D.                                                                                                                                                                                                                                             |
| <b>Title</b>                             | Protocol Co-Chair                                                                                                                                                                                                                                                    |
| <b>Institution Name</b>                  | University of Alabama at Birmingham School of Optometry<br>1720 2 <sup>nd</sup> Ave South<br>Birmingham, AL 35294<br>Phone: (205) 934-2933<br>Fax: (205) 934-6758<br>Email: <a href="mailto:kweise@uab.edu">kweise@uab.edu</a>                                       |
| <b>Medical Monitor</b>                   |                                                                                                                                                                                                                                                                      |
| <b>Name, degree</b>                      | Roy W. Beck, M.D., Ph.D.                                                                                                                                                                                                                                             |
| <b>Title</b>                             | Director, Jaeb Center for Health Research                                                                                                                                                                                                                            |
| <b>Institution Name</b>                  | Jaeb Center for Health Research<br>15310 Amberly Drive, Suite 350<br>Tampa, FL 33647<br>Phone: 1-888-797-3344<br>Fax: 1-888-697-3344                                                                                                                                 |

337  
338  
339  
340  
341  
342  
343  
344  
345  
346  
347  
348  
349  
350  
351  
352  
353  
354  
355  
356  
357  
358  
359  
360  
361  
362  
363  
364  
365  
366  
367  
368  
369  
370  
371  
372  
373  
374  
375  
376  
377  
378  
379  
380  
381  
382  
383  
384  
385  
386  
387  
388  
389  
390  
391  
392  
393  
394

# TABLE OF CONTENTS

|                                                                                             |            |
|---------------------------------------------------------------------------------------------|------------|
| <b>KEY ROLES.....</b>                                                                       | <b>10</b>  |
| <b>LIST OF ABBREVIATIONS.....</b>                                                           | <b>13</b>  |
| <b>CHAPTER 1: BACKGROUND AND SUMMARY .....</b>                                              | <b>1-1</b> |
| 1.1    Epidemiology and Clinical Characteristics: .....                                     | 1-1        |
| 1.2    Retardation of Myopia Progression: .....                                             | 1-1        |
| 1.3    Atropine Treatment: .....                                                            | 1-1        |
| 1.4    Previous Randomized Trials of Atropine Treatment to Reduce Myopia Progression: ..... | 1-2        |
| 1.5    Persistence of Atropine Effect: .....                                                | 1-6        |
| 1.6    Atropine and Race: .....                                                             | 1-6        |
| 1.7    Safety of Atropine Treatment: .....                                                  | 1-6        |
| 1.8    Why is Another RCT Needed? .....                                                     | 1-9        |
| 1.9    Public Health Importance .....                                                       | 1-9        |
| 1.10   Study Objectives.....                                                                | 1-10       |
| 1.11   Synopsis of Study Design.....                                                        | 1-10       |
| 1.12   Study Flow Chart.....                                                                | 1-13       |
| <b>CHAPTER 2: ENROLLMENT .....</b>                                                          | <b>2-1</b> |
| 2.1    Eligibility Assessment and Informed Consent/Assent.....                              | 2-1        |
| 2.2    Eligibility Criteria for Enrollment into Run-in Phase.....                           | 2-1        |
| 2.3    Historical Information .....                                                         | 2-2        |
| 2.4    Testing at the Enrollment/Run-in Visit.....                                          | 2-2        |
| 2.5    Refractive Correction .....                                                          | 2-3        |
| 2.6    Treatment in Run-In Phase .....                                                      | 2-4        |
| <b>CHAPTER 3: RANDOMIZATION.....</b>                                                        | <b>3-1</b> |
| 3.1    Assessment of Compliance with Artificial Tears .....                                 | 3-1        |
| 3.2    Assessment of Compliance with Refractive Correction .....                            | 3-1        |
| 3.3    Testing at the Randomization Visit .....                                             | 3-1        |
| 3.4    Confirmation of Eligibility for Randomization .....                                  | 3-2        |
| 3.5    Randomization.....                                                                   | 3-3        |
| <b>CHAPTER 4: TREATMENT AND FOLLOW-UP IN RANDOMIZED TRIAL.....</b>                          | <b>4-1</b> |
| 4.1    Study Medication.....                                                                | 4-1        |
| 4.2    Treatment 0 to 24 Months .....                                                       | 4-1        |
| <b>4.3    Telephone Calls.....</b>                                                          | <b>4-1</b> |
| 4.4    Masking of Treatment Group .....                                                     | 4-1        |
| 4.5    Compliance with Study Treatment .....                                                | 4-1        |
| 4.6    Off-Treatment Phase >24 to 30 Months .....                                           | 4-2        |
| 4.7    Side Effects of Treatment .....                                                      | 4-2        |
| 4.8    Follow-up Visit Schedule in Randomized Trial .....                                   | 4-2        |
| 4.9    Follow-up Visit Testing Procedures .....                                             | 4-2        |
| 4.10   Management of Refractive Error .....                                                 | 4-3        |
| 4.11   Non-Randomized Treatment Other than Refractive Correction .....                      | 4-4        |
| 4.12   General Considerations.....                                                          | 4-4        |
| <b>CHAPTER 5: MISCELLANEOUS CONSIDERATIONS IN FOLLOW-UP .....</b>                           | <b>5-1</b> |
| 5.1    Participant Withdrawals .....                                                        | 5-1        |
| 5.2    Discontinuation of Study.....                                                        | 5-1        |
| 5.3    Travel Reimbursement .....                                                           | 5-1        |
| 5.4    Costs Covered by the Study.....                                                      | 5-1        |
| 5.5    Costs Not Covered by the Study.....                                                  | 5-1        |
| <b>CHAPTER 6: ADVERSE EVENTS AND RISKS.....</b>                                             | <b>6-1</b> |
| 6.1    Recording of Adverse Events .....                                                    | 6-1        |
| 6.2    Reporting Serious or Unexpected Adverse Events .....                                 | 6-2        |
| 6.3    Data and Safety Monitoring Committee Review of Adverse Events .....                  | 6-2        |
| 6.4    Risks .....                                                                          | 6-2        |
| 6.4.1    Risks of Examination Procedures .....                                              | 6-2        |
| 6.4.2    Risk of Atropine Therapy .....                                                     | 6-3        |
| 6.4.3    Risk Assessment .....                                                              | 6-4        |
| <b>CHAPTER 7: SAMPLE SIZE ESTIMATION AND STATISTICAL ANALYSIS .....</b>                     | <b>7-1</b> |

|     |         |                                                                            |             |
|-----|---------|----------------------------------------------------------------------------|-------------|
| 395 | 7.1     | Primary Objective: Efficacy on Atropine Treatment (24 Months) .....        | 7-1         |
| 396 | 7.1.1   | Primary Analysis – Refractive Error at 24 Months (On-Treatment).....       | 7-1         |
| 397 | 7.1.1.1 | Sensitivity Analyses .....                                                 | 7-1         |
| 398 | 7.1.2   | Secondary Outcomes at 24 Months (On-Treatment) .....                       | 7-1         |
| 399 | 7.1.2.1 | Proportion of Participants with Progression $\geq 2D$ at 24 Months .....   | 7-1         |
| 400 | 7.1.2.2 | Change in Axial Length at 12 and 24 Months.....                            | 7-2         |
| 401 | 7.1.2.3 | Compliance .....                                                           | 7-2         |
| 402 | 7.1.3   | Secondary Outcomes at 12 Months (On-Treatment).....                        | 7-2         |
| 403 | 7.1.3.1 | Refractive Error at 12 Months.....                                         | 7-2         |
| 404 | 7.1.3.2 | Proportion of Participants with Progression $\geq 1D$ at 12 Months .....   | 7-2         |
| 405 | 7.2     | Secondary Objective: Efficacy off Atropine Treatment (30 Months) .....     | 7-2         |
| 406 | 7.3     | Additional Analyses .....                                                  | 7-3         |
| 407 | 7.3.1   | Treatment Effect in Subgroups .....                                        | 7-3         |
| 408 | 7.3.2   | Treatment Effect over Time.....                                            | 7-3         |
| 409 | 7.3.3   | Exploratory Analyses of Additional Ocular Biometric Parameters .....       | 7-3         |
| 410 | 7.4     | Safety Analyses .....                                                      | 7-3         |
| 411 | 7.4.1   | Adverse Effects of Eye Drops.....                                          | 7-3         |
| 412 | 7.4.2   | Visual Acuity .....                                                        | 7-3         |
| 413 | 7.5     | Need for Bifocals.....                                                     | 7-4         |
| 414 | 7.6     | Interim Analysis .....                                                     | 7-4         |
| 415 | 7.7     | Data Tabulations and Other Analyses .....                                  | 7-4         |
| 416 | 7.8     | Sample Size .....                                                          | 7-4         |
| 417 | 7.8.1   | General Considerations.....                                                | 7-4         |
| 418 | 7.8.2   | Sample Size for Primary Objective: Efficacy on Atropine Treatment.....     | 7-4         |
| 419 | 7.8.3   | Sample Size for Secondary Objective: Efficacy off Atropine Treatment ..... | 7-5         |
| 420 | 7.8.4   | Summary of Sample Size Estimation.....                                     | 7-6         |
| 421 | 7.8.5   | Precision within Racial Subgroups .....                                    | 7-6         |
| 422 |         | <b>CHAPTER 8: DATA COLLECTION AND MONITORING .....</b>                     | <b>8-1</b>  |
| 423 | 8.1     | Case Report Forms and Device Data.....                                     | 8-1         |
| 424 | 8.2     | Study Records Retention .....                                              | 8-1         |
| 425 | 8.3     | Quality Assurance and Monitoring.....                                      | 8-1         |
| 426 | 8.4     | Protocol Deviations .....                                                  | 8-2         |
| 427 |         | <b>CHAPTER 9: ETHICS/PROTECTION OF HUMAN PARTICIPANTS.....</b>             | <b>9-1</b>  |
| 428 | 9.1     | Ethical Standard.....                                                      | 9-1         |
| 429 | 9.2     | Institutional Review Boards .....                                          | 9-1         |
| 430 | 9.3     | Informed Consent Process.....                                              | 9-1         |
| 431 | 9.3.1   | Consent Procedures and Documentation .....                                 | 9-1         |
| 432 | 9.3.2   | Participant and Data Confidentiality.....                                  | 9-1         |
| 433 |         | <b>CHAPTER 10: REFERENCES .....</b>                                        | <b>10-1</b> |
| 434 |         |                                                                            |             |

435

## LIST OF ABBREVIATIONS

436

| ABBREVIATION | DEFINITION                                                              |
|--------------|-------------------------------------------------------------------------|
| ANCOVA       | Analysis of Covariance                                                  |
| ATOM         | Atropine for the Treatment of Childhood Myopia Study                    |
| CFR          | Code of Federal Regulations                                             |
| CI           | Confidence Interval                                                     |
| CLEERE       | Collaborative Longitudinal Evaluation of Ethnicity and Refractive Error |
| CRF          | Case Report Form                                                        |
| DSMC         | Data Safety and Monitoring Committee                                    |
| FDA          | Food and Drug Administration                                            |
| GCP          | Good Clinical Practice                                                  |
| ICH          | International Council for Harmonisation                                 |
| IRB          | Institutional Review Board                                              |
| MCMC         | Monte Carlo Markov Chain                                                |
| PI           | Principle Investigator                                                  |
| PEDIG        | Pediatric Eye Disease Investigator Group                                |
| QA           | Quality Assurance                                                       |
| QC           | Quality Control                                                         |
| RBM          | Risk Based Monitoring                                                   |
| SE           | Spherical equivalent                                                    |
| SER          | Spherical equivalent refractive error                                   |
| SVL          | Single vision lenses                                                    |

437

## Chapter 1: BACKGROUND AND SUMMARY

This study is being conducted by the Pediatric Eye Disease Investigator Group (PEDIG) and funded through a cooperative agreement from the National Eye Institute of the National Institutes of Health.

### 1.1 Epidemiology and Clinical Characteristics:

Myopia is one of the most commonly occurring ocular disorders, with an estimated prevalence of 13% to 49% in adult population-based studies.<sup>1,2</sup> In children, the prevalence of myopia in population-based studies worldwide ranges from 1.2% to 59.1%,<sup>1,3,4</sup> with variations due to age and race and definition used to classify myopia. In the US, in children 6-72 months of age, prevalence has been reported at 0.7 -1.2% in Non-Hispanic white children,<sup>5,6</sup> 3.98% in Asian children,<sup>6</sup> 5.5-6.6% in African American children<sup>5,7</sup> and 3.7% in Hispanic children.<sup>7</sup> Not only is the prevalence of myopia in adults relatively high, but it is increasing in the US<sup>8</sup> (<http://www.nei.nih.gov/eyedata/myopia.asp#4>) and around the world.<sup>9</sup>

Progression of myopia primarily occurs due to elongation of the axial length of the eye. The average increase in myopia has been estimated at 0.5 diopters per year (personal communication with the Collaborative Longitudinal Evaluation of Ethnicity and Refractive Error (CLEERE) study group between November 2015 and April 2016).<sup>10-12</sup> Retarding progression of myopia has been the focus of much research, since high levels of myopia (>-6.00D) are associated with retinal and vitreous detachment, myopic macular degeneration, and increased risk of glaucoma and cataract.<sup>13,14</sup> A recent report for the US Population estimated the prevalence of high myopia and myopic choroidal neovascularization to be 3.92% (95% confidence interval [CI], 2.82-5.60) and 0.017% (95% CI, 0.010-0.030), respectively, among adults in the United States aged 18 years and older in 2014.<sup>15</sup> This translated into a population burden of approximately 9 614 719 adults with high myopia, and 41 111 adults with myopic choroidal neovascularization.

### 1.2 Retardation of Myopia Progression:

Treatment to retard myopia progression is important for preventing the development of high myopia and associated sequelae. Various management approaches have been reported, with varying success, including the use of anti-muscarinic pharmacological agents (atropine, pirenzepine, cyclopentolate), bifocals, progressive additional lenses, contact lenses, contact lenses with peripheral myopic defocus, under-correction or part-time optical correction, and orthokeratology.<sup>16,17</sup> Some studies have found that an increase in the amount of time spent outdoors may have a protective effect on the progression of myopia.<sup>18-20</sup> In a recent Cochrane Systematic Review entitled Interventions to Slow Progression of Myopia in Children,<sup>16</sup> anti-muscarinic pharmacological treatments were found to be more effective than other treatments. Nevertheless, side-effects from mydriasis and cycloplegia with atropine 1% were significant. More conclusive evidence is needed regarding optimal dose (i.e., dose with meaningful treatment effect with minimal side-effects), lasting effects of treatment, and efficacy of anti-muscarinic pharmacological treatments combined with other treatment modalities, such as bifocals.<sup>16</sup>

### 1.3 Atropine Treatment:

Use of topical atropine for treatment of myopia has been advocated since the 1800s.<sup>21</sup> Summarizing a wealth of knowledge on atropine treatment for reduction of myopia progression,

484 1% atropine daily with or without multi-focal spectacles is most commonly used, resulting in an  
485 average reduction of myopia progression of 90%.<sup>22</sup> The mechanism by which atropine slows  
486 myopia progression is largely unknown, but has been hypothesized to occur via elimination of  
487 accommodation, local retinal effects that slow progression, or potential biochemical changes  
488 brought about through binding of atropine with the muscarinic receptors.<sup>16</sup> Another possible  
489 mechanism of slowing myopic progression with atropine may be via increased UVA exposure<sup>23</sup>  
490 as a result of a dilated pupil, which exposure has been shown to strengthen the sclera via  
491 crosslinking of scleral collagen,<sup>24</sup> potentially limiting axial lengthening. Although this last  
492 mechanism is somewhat speculative, the general impression from the literature is that, regardless  
493 of mechanism, 1% atropine appears to be very effective.

494

#### 495 **1.4 Previous Randomized Trials of Atropine Treatment to Reduce Myopia Progression:**

496 Several randomized trials of prevention of myopia progression using atropine have been  
497 conducted in recent years.

- 498 • Yen and colleagues<sup>25</sup> in 1989 compared one year of 1% atropine every other night, 1%  
499 cyclopentolate every night, and normal saline every night in 96 children aged 6 to 14  
500 years with myopia ranging from -0.50D to -4.00D. Children in the atropine group had a  
501 mean myopia progression over 1 year of -0.219D, whereas children receiving  
502 cyclopentolate progressed -0.578D and children receiving normal saline progressed -  
503 0.914D.
- 504 • In 1999, Shih and colleagues<sup>26</sup> reported a study of 200 children aged 6 to 13 years with  
505 myopia ranging from -0.50D to -6.75D that compared 0.5%, 0.25%, and 0.1% atropine to  
506 5% tropicamide. Children received atropine or tropicamide eyedrops nightly for up to 2  
507 years. At the end of 2 years, all atropine-treatment groups had less myopia progression (-  
508 0.04±0.63 D/year, -0.45±0.55D/year, and -0.47± 0.91D/year, respectively) than the  
509 tropicamide group (-1.06±0.61D/year).
- 510 • Subsequently, Shih and colleagues<sup>27</sup> studied the effect of multi-focal glasses with and  
511 without atropine to control progression of myopia. The study randomized 227 children to  
512 18 months of 0.5% atropine + multifocal lenses, multi-focal lenses alone, or single vision  
513 glasses. Myopia progressed only -0.42D±0.07D with atropine + multi-focal lenses  
514 compared with -1.19D±0.07D with multi-focal lenses and -1.40D±0.09D with single  
515 vision lenses, leading the authors to conclude that atropine treatment is effective for  
516 slowing the progression of myopia and may act via a mechanism of accommodation  
517 inhibition.
- 518 • More recently, the Atropine for the Treatment of Childhood Myopia (ATOM) study was  
519 a RCT comparing nightly administration of 1% atropine to vehicle (0.5% hydroxypropyl  
520 methylcellulose and 1:10,000 benzalkonium chloride) over 2 years in 400 children ages 6  
521 to 12 years with myopia ranging from -1.00D to -6.00D.<sup>28</sup> Only one eye of each child  
522 was chosen for treatment. After 2 years, myopia in children receiving 1% atropine had  
523 progressed -0.28D±0.92D versus -1.20D±0.69D in the placebo-treated eye (Figure 1).  
524 Axial length was also reduced in atropine-treated eyes compared with placebo-treated  
525 eyes (-0.02±0.35mm vs 0.38±0.38mm).
- 526 • The ATOM2 study<sup>29</sup> compared 3 doses of atropine (0.5%, 0.1% and 0.01%) in 400  
527 children with myopia of at least -2.00D and found 2-year myopia progression of -  
528 0.30±0.60D, -0.38±60D, and -0.49±0.63D respectively (Figure 1). Although there was no  
529 control group, myopia progression was significantly lower than that observed in controls

530 in ATOM1 ( $-1.20D \pm 0.69D$ ), but was not different from the 1% atropine-treated cohort ( $-$   
531  $0.28D \pm 0.92D$ ). Axial length growth was lower in both 0.5% and 0.1% groups compared  
532 with the 0.01% group ( $0.27 \pm 0.25\text{mm}$ ,  $0.28 \pm 0.27\text{mm}$ , and  $0.41 \pm 0.32\text{mm}$  respectively,  
533  $P < 0.001$ ).

534  
535 The effect of treatment on myopia progression and axial length in these randomized trials is  
536 compiled in Table 1. Although there were good overall results with atropine treatment, a logistic  
537 regression analysis of ATOM1 data suggested that there is a subgroup of participants (younger  
538 participants with higher levels of myopia and trending towards progression) whose myopia  
539 progressed significantly despite atropine treatment.<sup>30</sup>



540 **Table 1: Summary of Randomized Trials Evaluating Effect of Atropine on Myopia Progression**

| Study              | Ethnicity | Treatment Group **                | N   | Time point | Change in Myopia (D) | Change in Axial Length (mm) | Comments                                                                                                                                                                                                                                              |
|--------------------|-----------|-----------------------------------|-----|------------|----------------------|-----------------------------|-------------------------------------------------------------------------------------------------------------------------------------------------------------------------------------------------------------------------------------------------------|
| Yen <sup>25</sup>  | Asian     | Control (saline)                  | 32  | 1 yr       | -0.914 ± 0.581       | not reported                | Only about 40% (96/247) of randomized participants included in analysis. Excluded participants with less than 100% compliance.                                                                                                                        |
|                    |           | Atropine 1%***                    | 32  | 1 yr       | -0.219 ± 0.538       | not reported                |                                                                                                                                                                                                                                                       |
|                    |           | Cyclopentolate 1%                 | 32  | 1 yr       | -0.578 ± 0.490       | not reported                |                                                                                                                                                                                                                                                       |
| Shih <sup>26</sup> | Asian     | Atropine 0.5%                     | 41  | ≤2 yr      | -0.04 ± 0.63         | not reported                | Likely confounded by refractive correction as “suggested” bifocals in atropine 0.5%, under-correction in atropine 0.25, and full correction in atropine 0.1%. Outcomes by cycloplegic autorefraction. Length of treatment/follow-up not well defined. |
|                    |           | Atropine 0.25%                    | 47  | ≤2 yr      | -0.45 ± 0.55         | not reported                |                                                                                                                                                                                                                                                       |
|                    |           | Atropine 0.1%                     | 49  | ≤2 yr      | -0.47 ± 0.91         | not reported                |                                                                                                                                                                                                                                                       |
|                    |           | Tropicamide                       | 49  | ≤2 yr      | -1.06 ± 0.61         | not reported                |                                                                                                                                                                                                                                                       |
| Shih <sup>27</sup> | Asian     | Control (SVL)****                 | 61  | 1.5 yr     | -1.40 ± 0.09         | 0.59 ± 0.04                 | Double blind randomization.                                                                                                                                                                                                                           |
|                    |           | Multifocal lenses                 | 66  | 1.5 yr     | -1.19 ± 0.07         | 0.49 ± 0.03                 |                                                                                                                                                                                                                                                       |
|                    |           | Atropine 0.5% + multifocal lenses | 61  | 1.5 yr     | -0.42 ± 0.07         | 0.22 ± 0.03                 |                                                                                                                                                                                                                                                       |
| ATOM <sup>28</sup> | Asian     | Control                           | NR  | 1 yr       | -0.76 ± 0.44         | 0.20 ± 0.30                 | Outcomes by masked cycloplegic autorefraction.                                                                                                                                                                                                        |
|                    |           |                                   | 190 | 2 yr       | -1.20 ± 0.69         | 0.38 ± 0.38                 |                                                                                                                                                                                                                                                       |
|                    |           | Atropine 1%                       | NR  | 1 yr       | 0.03 ± 0.50          | -0.14 ± 0.28                | Number of participants analyzed at 1yr not specified but suspect similar to number analyzed at 2yrs.                                                                                                                                                  |
|                    |           |                                   | 166 | 2 yr       | -0.28 ± 0.92         | -0.02 ± 0.35                |                                                                                                                                                                                                                                                       |
| ATOM <sup>29</sup> | Asian     | Atropine 0.5%                     | NR  | 1 yr       | -0.17 ± 0.47         | 0.11 ± 0.17                 | Outcomes by cycloplegic autorefraction, but no control group.                                                                                                                                                                                         |
|                    |           |                                   | 139 | 2 yr       | -0.30 ± 0.60         | 0.27 ± 0.25                 |                                                                                                                                                                                                                                                       |
|                    |           | Atropine 0.1%                     | NR  | 1 yr       | -0.31 ± 0.50         | 0.13 ± 0.18                 | Number of participants analyzed at 1yr not specified but suspect similar to number analyzed at 2yrs.                                                                                                                                                  |
|                    |           |                                   | 141 | 2 yr       | -0.38 ± 0.60         | 0.28 ± 0.27                 |                                                                                                                                                                                                                                                       |
|                    |           | Atropine 0.01%                    | NR  | 1 yr       | -0.43 ± 0.52         | 0.24 ± 0.19                 |                                                                                                                                                                                                                                                       |
|                    |           |                                   | 75  | 2 yr       | -0.49 ± 0.60         | 0.41 ± 0.32                 |                                                                                                                                                                                                                                                       |
| ATOM <sup>31</sup> | Asian     | Atropine 0.01%                    | 17  | 5 yr       | -2.25 ± 1.11         | 1.21 ± 0.54                 | Children progressing more than 0.50 D during washout year three were started back on atropine 0.01% for two additional years.                                                                                                                         |
|                    |           | Atropine 0.1%                     | 82  | 5 yr       | -2.34 ± 1.07         | 1.08 ± 0.53                 |                                                                                                                                                                                                                                                       |
|                    |           | Atropine 0.5%                     | 93  | 5 yr       | -2.32 ± 1.04         | 1.03 ± 0.47                 |                                                                                                                                                                                                                                                       |

541 \*N = number with outcome data. NR = not reported. \*\*Daily treatment unless otherwise noted \*\*\*Treatment every other day. \*\*\*\*SVL = single vision lenses  
542

543 Figure 1: Summary of Findings from ATOM<sup>28</sup> and ATOM<sup>29</sup> Studies\*  
 544  
 545

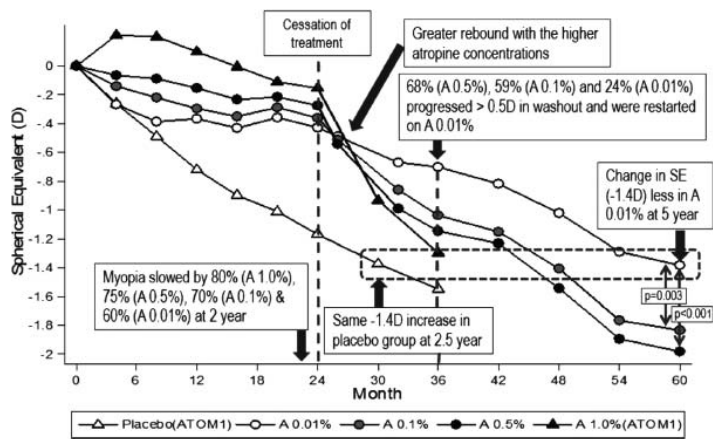

Figure 6. Summary of findings from the ATOM1 and ATOM2 studies: change in spherical equivalent (SE). ATOM = Atropine for the Treatment of Myopia; D = diopter.

546  
 547  
 548  
 549 \*Figure reproduced from Chia et al, 2016.<sup>31</sup>

550  
551  
552  
553  
554  
555  
556  
557  
558  
559  
560  
561  
562  
563  
564  
565  
566  
567  
568  
569  
570  
571  
572  
573  
574  
575

### 1.5 Persistence of Atropine Effect:

Following cessation of atropine treatment, there appears to be a rebound of myopia progression, although the rate of myopia progression differs between studies and depending on which dose of atropine was used. In a prospective long-term study, Brodstein and colleagues<sup>32</sup> followed 253 children treated with atropine for up to 9 years. They found a rebound in myopia progression, but the rate was no higher than observed in control participants. In a retrospective population-based study of atropine treatment for myopia, 214 children in Olmsted County, MN were followed for a mean of 11.7 years, along with age-matched controls. Final refraction data at age 20 years indicated that benefits of atropine treatment remain after atropine treatment was discontinued. Nevertheless, length of treatment and follow-up was not standardized in this retrospective study. In the ATOM1 study, children were followed off atropine treatment, and myopia progression was reported after 1 year.<sup>33</sup> A higher rate of myopia progression in atropine-treated eyes following cessation of atropine compared with control fellow eyes was reported ( $-1.14\pm 0.80D$  vs  $-0.38\pm 0.39D$  in 1 year) (Figure 1). However, overall myopia remained less severe in atropine-treated eyes at the end of 3 years. In the subsequent ATOM2 study,<sup>34</sup> 356 of the 400 children enrolled in ATOM2 were followed for an additional year after stopping atropine. Myopia progression off atropine was greatest following treatment with 0.5% atropine ( $-0.87\pm 0.52D$ ), with less progression off treatment with 0.1% ( $-0.68\pm 0.45D$ ) and 0.01% ( $-0.28\pm 0.33D$ ), leading to the conclusion that the effect of 0.01% atropine is more sustained following treatment than with higher doses (Figure 1). The 0.01% atropine was restarted in a subgroup that progressed more than 0.5 D in the washout year (year 3) for two additional years. The resumption of atropine 0.01% treatment showed a lower progression in the subgroup treated initially with atropine 0.01%, compared with higher doses in the first phase of the study (years one and two).<sup>31</sup>

### 1.6 Atropine and Race:

Early in the 1900's, differences in dilation response to mydriatic drugs (although not specifically atropine) were reported between different races, with African American and Asian participants requiring a longer time for mydriasis than White participants.<sup>35</sup> This phenomenon has become a common clinical experience and has been reproduced by the works of others.<sup>36</sup> Work by Salazar et al explored the mechanism by which this racial difference may occur, reporting that atropine is rapidly taken up by melanocytes and released over time, leading to a longer time required to achieve mydriasis and a prolonged mydriatic effect in heavily-pigmented eyes as atropine is released over an extended period of time.<sup>37</sup> In a meta-analysis of atropine for slowing progression of myopia, Li et al<sup>38</sup> report that atropine slows the progression of myopia more in Asian populations of children than it does for populations of white children, but note that comparisons are limited by the lack of studies in non-Asian populations. They conclude that further studies to determine ethnic differences in the effect of atropine for slowing the progression of myopia are needed.

### 1.7 Safety of Atropine Treatment:

Atropine use is associated with photophobia, mydriasis, accommodative paralysis, and allergic or hypersensitivity reactions. In an effort to reduce these side effects, Shih et al<sup>26</sup> used 3 lower doses of atropine than the commonly used 1% concentration (i.e., 0.5%, 0.25%, 0.1%), reporting that 0.25% and 0.1% atropine were well-tolerated throughout their 2-year study (no systemic or ocular complications identified). The ATOM2 study also tested lower concentrations of atropine

597 (0.5%, 0.1%, and 0.01%), reporting that allergic conjunctivitis and dermatitis occurred in the  
598 0.5% and 0.1% groups, but were absent in the 0.01% group, which only reported 1 case of near  
599 blur and 1 case of irritation.<sup>29</sup> The authors reported that 7% of children receiving atropine 0.01%  
600 requested glasses for blur or for photosensitivity in years one and two. In the further extension  
601 study to 5 years, no child required glasses for blur at near or for photosensitivity.<sup>31</sup> Cooper et al<sup>39</sup>  
602 conducted a study to determine the maximal dose of atropine that is not associated with clinical  
603 symptoms associated with higher doses, reporting that a dose of 0.02% atropine is the maximum  
604 effective dose without clinical signs or symptoms. A recent study in 14 white university students  
605 found atropine 0.01% to be well tolerated.<sup>40</sup>

606  
607 Below (Table 2) is a summary of side effects reported with various doses of atropine for the  
608 treatment of myopia progression in children.  
609

610 **Table 2. Side Effects/Safety of Atropine Treatment of Myopia**

| Study                                    | Ethnicity / Eye Color              | Study Type* | N**              | Dose***                       | Side effects                                                                                                                                                                                                                                                                                                                                                                                                                                                 |
|------------------------------------------|------------------------------------|-------------|------------------|-------------------------------|--------------------------------------------------------------------------------------------------------------------------------------------------------------------------------------------------------------------------------------------------------------------------------------------------------------------------------------------------------------------------------------------------------------------------------------------------------------|
| Yen 1989 <sup>25</sup>                   | Asian                              | Pro         | 32               | 1%<br>****                    | All experienced photophobia. No systemic or ocular complications reported.                                                                                                                                                                                                                                                                                                                                                                                   |
| Kennedy 2000 <sup>41</sup>               | Minnesota --mainly white           | Retro       | 214              | 1%                            | Photophobia (40.2%), Blurred vision (10.7%), Ocular allergic reaction (3.7%), Ocular discomfort (3.7%), Headache (2.3%), Bad taste in mouth (2.3%), Dry mouth (1.9%), Dry eyes (1.4%), Psychological problems (0.5%), Dizziness (0.5%)                                                                                                                                                                                                                       |
| ATOM1 (Chua 2006) <sup>28</sup>          | Asian                              | Pro         | 200              | 1%                            | No serious adverse events. Study withdrawals due to allergic or hypersensitivity reaction (4.5%), glare (1.5%), and blurred vision (1%)                                                                                                                                                                                                                                                                                                                      |
| ATOM1 recovery (Tong 2009) <sup>33</sup> | Asian                              | Pro         | 158              | 1%                            | Small decrease in best-corrected visual acuity from baseline, but ≤3 letters in all participants (occurred in controls as well). No reduction in near visual acuity compared with controls. No lens opacities.                                                                                                                                                                                                                                               |
| Shih 1999 <sup>26</sup>                  | Asian                              | Pro         | 41<br>47<br>49   | 0.5%<br>0.25%<br>0.1%         | <b>0.5%:</b> light sensitivity persisting >3 months in 22%, 2 children with intolerable photophobia, 2 children with fear of long-term effects, 1 child with recurrent blepharitis.<br><b>0.25%:</b> light sensitivity >4 weeks in 7%. No systemic or ocular complications.<br><b>0.1%:</b> No light sensitivity beyond 4 weeks. No systemic or ocular complications.                                                                                        |
| ATOM2 (Chia 2012) <sup>29</sup>          | Asian                              | Pro         | 139<br>141<br>75 | 0.5%<br>0.1%<br>0.01%         | <b>0.5%:</b> Reduced accommodation, impaired near visual acuity, and pupil size increased >3mm. Allergic conjunctivitis (6.2%). Serious adverse reactions (2%)<br><b>0.1%:</b> Reduced accommodation, impaired near visual acuity, and pupil size increased >3mm. Allergic conjunctivitis (4.5%). Serious adverse reactions (2%)<br><b>0.01%:</b> Serious adverse reactions (1%). Minimally reduced accommodation. No allergic conjunctivitis or dermatitis. |
| ATOM2 recovery (Chia 2014) <sup>34</sup> | Asian                              | Pro         | 138<br>139<br>71 | 0.5%<br>0.1%<br>0.01%         | <b>0.5%:</b> Accommodation reduced for 1 year after stopping (2 years administration). Near acuity reduced for an additional month.<br><b>0.1%:</b> No effects after stopping<br><b>0.01%:</b> No effects after stopping. 7% were given glasses for blur or photosensitivity <sup>31</sup>                                                                                                                                                                   |
| Wu 2011 <sup>42</sup>                    | Asian                              | Retro       | 97               | 0.05% for 6 months, then 0.1% | No reports of cataract or retinopathy noted during study period. Complaints of near blurring were “uncommon”                                                                                                                                                                                                                                                                                                                                                 |
| Cooper 2013 <sup>39</sup>                | Brown iris U.S. race not specified | Pro         | 3<br>6<br>3      | 0.05%<br>0.025%<br>0.012%     | <b>0.05%:</b> Accommodation deficits- no accommodation in 1 participant, 6D accommodation in 2 participants.<br><b>0.025%:</b> borderline accommodation in 2 of 6 participants, clinically significant pupil dilation in 4 of 6 participants and minimal in 2 of 6.<br><b>0.0125%:</b> 2 of 3 with subnormal accommodation (but no blurred vision).                                                                                                          |
| Lee 2006 <sup>43</sup>                   | Asian                              | Retro       | 21               | 0.05%                         | <b>33%</b> had morning photophobia (1 into afternoon). 10% had hampered near vision. No irritation or allergic effects.                                                                                                                                                                                                                                                                                                                                      |
| Fang 2010 <sup>44</sup>                  | Asian                              | Retro       | 24               | 0.025%                        | <b>16%</b> complained of photophobia with atropine vs 8% in control (p=0.4). No complaints of blurred vision. No systemic side effects.                                                                                                                                                                                                                                                                                                                      |
| Ekdawi 2015 (AAPOS Poster 2015)          | Mostly Caucasian                   | Retro       | 7                | 0.01%                         | 1(14%) participant had headaches and discontinued treatment after 7 months. Participants (number not specified) had difficulty with reading in the first weeks that did not persist past 4-6 weeks with continued use.                                                                                                                                                                                                                                       |

611 \*Study type: Pro = prospective study Retro = retrospective study  
612 \*\*N = number with outcome data.  
613 \*\*\*Treatment is daily unless otherwise noted  
614 \*\*\*\*Treatment is every other day.

615 **1.8 Why is Another RCT Needed?**

616 To date, randomized trials of atropine for slowing the progression of myopia in children have  
617 been primarily conducted on Asian populations. A meta-analysis comparing the effect of  
618 atropine on myopia progression in Asian and White children using data from both RCTs and  
619 prospective cohort studies concluded that atropine may have a greater effect in Asian  
620 populations.<sup>38</sup> A potential explanation of the observed differences of myopia progression  
621 between Asian and White children may be the mydriatic differences observed between highly  
622 pigmented and lowly pigmented eyes in response to atropine.<sup>35-37</sup> Although results of current  
623 RCTs are promising, additional studies in non-Asian populations are needed<sup>38</sup> to test the efficacy  
624 of atropine in counteracting myopia progression, including dose studies.

625  
626 **1.9 Public Health Importance**

627 The increasing prevalence of myopia and the unresolved problem of myopia progression pose  
628 significant healthcare concerns. Increasing axial length and especially high levels of myopia (>-  
629 6.00D) are associated with serious ocular co-morbidities, often resulting in visual impairment or  
630 even blindness.<sup>45</sup> These include retinal detachment, myopic maculopathy, glaucoma and  
631 cataract. While much research has considered the impact of preventing high myopia  
632 development, there are relatively few participants who progress to those levels that would benefit  
633 from reduction in progression. What is omitted from that discussion is the impact on reducing the  
634 proportion of participants who progress even to moderate myopia. Many individuals would  
635 retain the ability to function without correction for some activities of daily living and not be  
636 constantly dependent on vision correction. But far more important to this research is the  
637 recognition that there is a large number of individuals who progress to moderate myopia and  
638 who by doing so are at increased risk for the same myopic complications compared with  
639 emmetropic individuals. While the risk of each adverse impact from myopia is lower at lesser  
640 amounts of myopia on an individual basis, the risk affects many more participants and thus  
641 slowing progression could protect more participants than from just preventing high myopia.

642  
643 Flitcroft has opined that it is important to slow progression even in the moderate range of -1.00  
644 to -6.00 D as those levels of myopia are also significantly associated with an increased risk of a  
645 range of ocular pathologies from glaucoma to retinal detachment<sup>46</sup> compared with emmetropia.  
646 Similarly, in the Blue Mountains Eye Study, the odds ratio for myopic maculopathy was 9.7  
647 when comparing myopia -3.00 to -4.99D with emmetropia.<sup>47</sup> Tideman et al found that the risk  
648 of visual impairment went up with increasing spherical myopia. They noted that the lifetime risk  
649 at 75 years of age of was 3.0%.<sup>45</sup>

650  
651 Many existing treatments to slow the progression of myopia have proven either ineffective or  
652 unacceptable to the participant when administered for many years. Low-dose atropine treatment  
653 has the potential to reduce the prevalence of high myopia, reduce myopic progression among  
654 children with moderate myopia, and thereby reduce the incidence of undesirable sequelae  
655 associated with myopia.

656

657 **1.10 Study Objectives**

658 The objectives for this randomized trial are:

- 659 1. To determine the efficacy of daily low-dose atropine (0.01%) for slowing myopia  
660 progression over a two-year treatment period in children aged 5 to less than 13 years with  
661 myopia -1.00 to -6.00D at the time of enrollment (Primary Outcome On-Treatment).  
662 2. To determine the efficacy of atropine treatment on myopia progression 6 months  
663 following cessation of low-dose atropine treatment (Secondary Outcome Off-Treatment).  
664

665 **1.11 Synopsis of Study Design**

666 The current study is designed as an efficacy study, making effort to maximize adherence to  
667 treatment group assignments. After a run-in phase during which all participants are treated with  
668 daily artificial tear eyedrops for 2-4 weeks (and glasses are updated if required) to assess their  
669 ability to adhere to daily eye drops, participants are randomly assigned to daily atropine or  
670 placebo for 24 months, followed by 6 months off treatment.  
671

672 Major Eligibility Criteria for Run-in Phase (see section 2.2 for a complete listing)

- 673 • Age 5 years to <13 years at time of enrollment. Children within 4 weeks of their 13<sup>th</sup>  
674 birthday are not eligible.  
675 • Refractive error meeting the following by cycloplegic *autorefracton*:  
676 ○ Myopia -1.00D to -6.00D spherical equivalent (SE) in both eyes  
677 ○ Astigmatism <=1.50D in both eyes  
678 ○ Anisometropia <1.00D SE  
679 • Currently wearing refractive correction (single vision eyeglasses or contact lenses)  
680 • Excellent compliance with refractive correction (more than 75% of all waking hours) for  
681 at least one month, based on investigator judgment after discussion with parent.  
682 • No current or previous myopia treatment with atropine, pirenzepine or other anti-  
683 muscarinic agent.  
684 • No current or previous use of bifocals, progressive-addition lenses, or multi-focal contact  
685 lenses.  
686 • No current or previous use of orthoK, rigid gas permeable, or other contact lenses being  
687 used to reduce myopia progression.  
688 • No known atropine allergy.  
689

690 Additional Eligibility Criteria for Randomization

- 691 • Compliance with artificial tears at least 90% (days compliant/total days since receiving  
692 study medication as evident by review of the compliance calendar and count of unused  
693 ampules) during the run-in phase.  
694 • Excellent compliance with refractive correction (more than 75% of all waking hours)  
695 during run-in phase, based on investigator judgment after review of compliance calendars  
696 and discussion with parent.  
697 • Refractive correction in each eye (single vision eyeglasses or contact lenses with any  
698 necessary adjustment for contact lens rotation and vertex distance) that meets the  
699 following criteria:  
700 ○ Myopia (by spherical equivalent) in both eyes must be corrected to within  $\pm 0.50$  D of  
701 the investigator's cycloplegic measurement of refractive error.  
702 ○ Cylinder power in both eyes must be within  $\pm 0.50$  D of the investigator's standard  
703 refraction technique, which can be based on a cycloplegic or non-cycloplegic  
704 refraction.



- 705           ○ Cylinder axis for both eyes must be within  $\pm 5$  degrees of the axis found on the  
706           investigator's refraction when cylinder power is  $\geq 1.00$  D or within  $\pm 15$  degrees  
707           when the cylinder power is  $< 1.00$  D.  
708           Measurement of refractive error for assessing the above criteria may be performed as an  
709           over-refraction or without refractive correction.
- 710           ● Best-corrected distance visual acuity in current correction meeting the following criteria:  
711               ○ 20/32 or better in each eye ( $\geq 76$  letters by E-ETDRS testing)  
712               ○ Interocular difference  $\leq 0.2$  logMAR ( $\leq 10$  letters by E-ETDRS testing)

713

#### 714 Treatment Groups

715 Participants are randomly assigned 2:1 to the following two treatment groups:

- 716           ● Atropine Group: 0.01% atropine eyedrops administered 1 drop to each eye daily in each  
717           eye for 24 months, followed by 6 months off atropine eyedrops
- 718           ● Placebo Group: Placebo eyedrops administered 1 drop to each eye daily in each eye for  
719           24 months, followed by 6 months off placebo eyedrops

720

#### 721 Sample Size

722 Approximately 186 participants will be randomized in a 2:1 ratio to the two treatment groups  
723 (~124 in the atropine group and ~62 in the placebo group).

724

#### 725 Visit / Contact Schedule (timed from randomization unless otherwise specified)

- 726           ● Enrollment into run-in phase using daily artificial tear eyedrops for 2-4 weeks (and  
727           glasses updated if required)
- 728           ● Randomization Visit (2-4 weeks after enrollment)
- 729           ● Phone Calls from site: after 2 weeks ( $\pm 3$  days), and after 3, 9, 15, 21, and 27 months ( $\pm$   
730           1 month)
- 731           ● Office Visits:
  - 732               ○ 6 months  $\pm 2$  weeks\*
  - 733               ○ 12 months  $\pm 2$  weeks\*
  - 734               ○ 18 months  $\pm 2$  weeks\*
  - 735               ○ 24 months  $\pm 4$  weeks: Primary Outcome On-Treatment – discontinue treatment  
736               after visit
  - 737               ○ 30 months  $\pm 4$  weeks: Secondary Outcome Off-Treatment– six months following  
738               discontinuation of treatment

739

740 \*A virtual visit may be completed at 6, 12, or 18-months if an in-person office visit cannot be completed  
741 by the participant. If any safety events are identified during a virtual visit, participants will have  
742 additional follow up as applicable.

743

#### 744 Testing Procedures

745 Cycloplegic autorefraction, axial length and additional biometry will be measured by a study  
746 certified examiner at the enrollment visit and by a masked examiner at all follow up visits using  
747 the same instrumentation on the participant throughout the study. Masking will be accomplished  
748 by having site personnel administer cyclopentolate to both eyes of each participant before he/she  
749 sees the masked examiner.

750

751 At randomization and each follow-up exam except the 30-month visit, the effect of eyedrops will  
752 be assessed with a questionnaire. Distance visual acuity will be assessed at randomization and



753 the 30-month visit. Binocular near visual acuity will be assessed at randomization and the 6-  
754 month visit.

755

756 Primary Analysis

- 757 • Treatment group comparison of change from baseline to 24 months in spherical  
758 equivalent (average of both eyes) as measured by a masked examiner using cycloplegic  
759 autorefraction (on-treatment comparison).

760

761 Secondary Analysis

- 762 • Treatment group comparison of change from baseline to 30 months in spherical  
763 equivalent (average of both eyes) as measured by a masked examiner using cycloplegic  
764 autorefraction (off-treatment comparison).

765

766 **1.12 Study Flow Chart**

**ENROLLMENT INTO RUN-IN PHASE**

**Major Eligibility Criteria at Enrollment for Run-in Phase** (see section 2.2 for a complete listing)

- Age 5 to <13 years of age at time of enrollment. Participants within 4-weeks of their 13<sup>th</sup> birthday are not eligible.
- Refractive error meeting the following by cycloplegic autorefraction:
  - Myopia -1.00D to -6.00D spherical equivalent (SE) in both eyes
  - Astigmatism <=1.50D in both eyes
  - Anisometropia <1.00D SE
- Currently wearing refractive correction
- Excellent compliance with refractive correction (>75% of waking hours) for ≥1 month prior to enrollment
- No current or previous myopia treatment with atropine, pirenzepine or other anti-muscarinic agent
- No current or previous use of bifocals, progressive-addition lenses, or multi-focal contact lenses
- No current or previous use of orthoK, rigid gas permeable, or other contact lenses to reduce myopia progression
- No known atropine allergy

**Enrollment Exam Procedures**

- Standard Refraction (with or without cycloplegia)
- Cycloplegic Autorefraction
- Cycloplegic Axial Length Measurement and Additional Biometry
- Prescribe refractive correction or change in refractive correction (if needed)
- Prescribe artificial tear eyedrops to be used one drop to each eye nightly for 2-4 weeks

**RUN-IN PHASE (2-4 WEEKS)**

- All participants are treated with daily artificial tear eyedrops
- Glasses are updated, if needed

**RANDOMIZATION VISIT (2-4 WEEKS AFTER ENROLLMENT)**

**Additional Eligibility Criteria for Randomization**

- Compliance with artificial tear eyedrops at least 90% during the run-in phase
- Excellent compliance with refractive correction (more than 75% of all waking hours) during the run-in phase
- Refractive correction in each eye (single vision eyeglasses or contact lenses with any necessary adjustment for contact lens rotation and vertex distance) that meets the following criteria:
  - Myopia (by spherical equivalent) in both eyes must be corrected to within ±0.50 D of the investigator’s cycloplegic measurement of refractive error.
  - Cylinder power in both eyes must be within ±0.50 D of the investigator’s standard refraction technique, which can be based on a cycloplegic or non-cycloplegic refraction.
  - Cylinder axis for both eyes must be within ±5 degrees of the axis found on the investigator’s refraction when cylinder power is ≥= 1.00 D or within ±15 degrees when the cylinder power is <1.00 D.
- Best-corrected distance visual acuity in current correction meeting the following criteria:
  - 20/32 or better in each eye (≥=76 letters by E-ETDRS testing)
  - Interocular difference <= 0.2 logMAR (<= 10 letters by E-ETDRS testing)

**Testing Procedures**

- Eye Drop Questionnaire
- Distance Visual Acuity Testing
- Binocular Near Visual Acuity
- Binocular Amplitude of Accommodation
- If > 4 weeks since enrollment into run-in phase, repeat cycloplegic autorefraction, axial length measurement and additional biometry

**IF NOT ELIGIBLE**  
withdraw  
participant from  
study

**IF ELIGIBLE**  
RANDOMIZE 2:1

**Daily 0.01% Atropine eye drops**

**Daily Placebo eye drops**

773  
774  
775  
776  
777  
778  
779

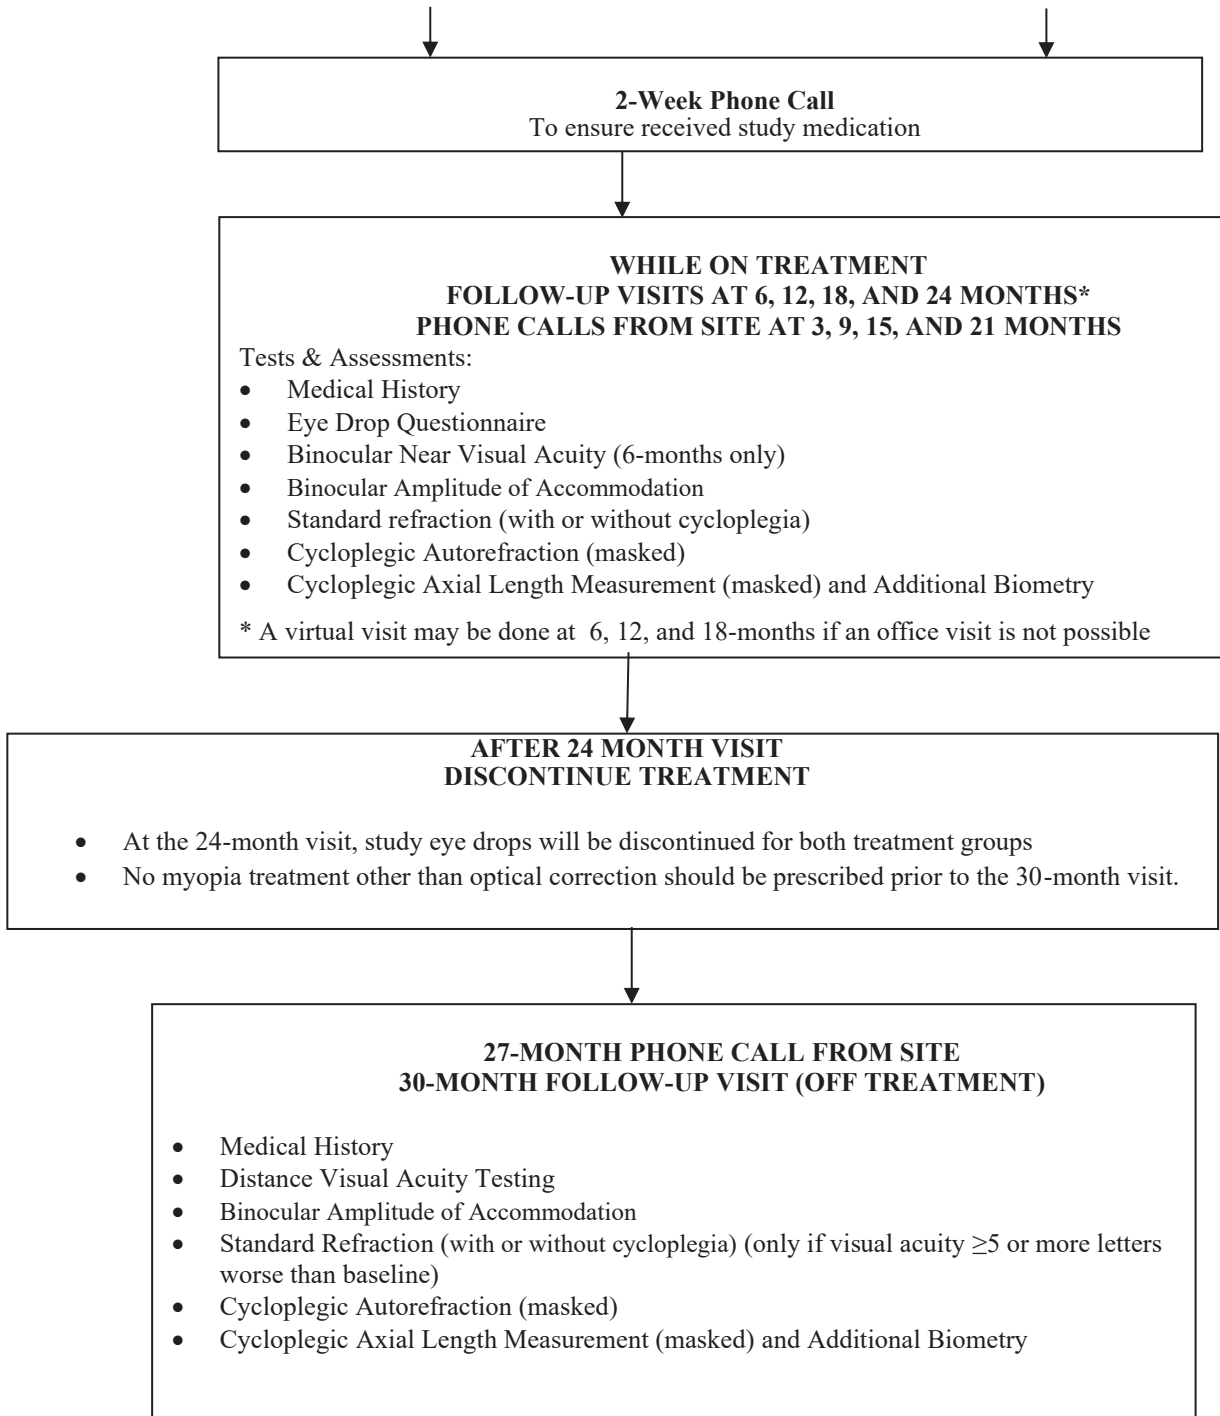

## Chapter 2: ENROLLMENT

### 2.1 Eligibility Assessment and Informed Consent/Assent

The study plans to enroll a maximum of 400 participants into the Run-In Phase for whom informed consent is provided, such that approximately 186 participants will enter the Randomized Trial Phase. The number of participants randomized who self-report as East Asian ethnicity will be limited to no more than 25% of the overall sample (n=47 participants).

As the enrollment goal into the Randomized Trial Phase approaches 186 participants, sites will be notified of the end date for recruitment into the Run-In Phase. Participants whose parents have signed an informed consent form may be entered into the Run-in Phase until the end date, which means the expected number for the Randomized Trial Phase might be exceeded during the Run-in Phase. Enrollment into the Run-In Phase may be temporarily halted if necessary until it is determined how many participants in the Run-in Phase will enter the Randomized Trial Phase. The anticipated randomized total of 186 participants could be exceeded as participants already enrolled into the Run-In Phase become eligible for the Randomized Trial Phase.

The study will be discussed with the child's parent(s) or guardian(s) (referred to subsequently as parent(s)). Parents who express an interest in the study will be given a copy of the informed consent form to read. Written informed consent / assent must be obtained from the parent and child prior to performing any study-specific procedures that are not part of routine care.

### 2.2 Eligibility Criteria for Enrollment into Run-in Phase

The following criteria must be met for the child to be enrolled into the study:

#### Inclusion Criteria

- Age 5 years to <13 years at time of enrollment. Children within 4 weeks of their 13<sup>th</sup> birthday are not eligible.
- Refractive error meeting the following by cycloplegic *autorefracton*:
  - Myopia -1.00D to -6.00D spherical equivalent (SE) in both eyes
  - Astigmatism  $\leq$ 1.50D in both eyes
  - Anisometropia <1.00D SE
- Currently wearing refractive correction (single vision eyeglasses or contact lenses)
- Excellent compliance with refractive correction (more than 75% of all waking hours) for at least one month, based on investigator judgment after discussion with parent.
- Gestational age  $\geq$  32 weeks.
- Birth weight >1500g.
- Parent understands the protocol and is willing to accept randomization to atropine or placebo.
- Is willing to participate in a 2 to 4 week run-in phase using daily artificial tear eyedrops.
- Able to return in 2 to 4 weeks for possible randomization.
- Parent has a phone (or access to phone) and is willing to be contacted by Investigator's site staff.
- Relocation outside of the area of an active PEDIG site within next 32 months is not anticipated.

#### Exclusion Criteria

- 827 • Current or previous myopia treatment with atropine, pirenzepine or other anti-muscarinic  
828 agent.
- 829 • Current or previous use of bifocals, progressive-addition lenses, or multi-focal contact  
830 lenses.
- 831 • Current or previous use of orthoK, rigid gas permeable, or other contact lenses being used  
832 to reduce myopia progression.
- 833 • Known atropine allergy.
- 834 • Abnormality of the cornea, lens, central retina, iris or ciliary body.
- 835 • Current or prior history of manifest strabismus, amblyopia, or nystagmus.
- 836 • Prior eyelid, strabismus, intraocular, or refractive surgery.
- 837 • Down syndrome or cerebral palsy.
- 838 • Diseases known to affect accommodation, vergence, or ocular motility (e.g., multiple  
839 sclerosis, Grave’s disease, myasthenia gravis, diabetes mellitus, Parkinson’s disease)
- 840 • Existing ocular conditions (e.g., retinal disease, cataracts, ptosis) or  
841 systemic/neurodevelopmental conditions (e.g., Down syndrome) which may influence  
842 refractive development.
- 843 • Any condition that in the judgement of the investigator could potentially influence  
844 refractive development.
- 845 • Existing conditions that may affect the long-term health of the eye or require regular  
846 pharmacologic treatment that may adversely interact with study medication (e.g., JIA,  
847 glaucoma, diabetes mellitus, pre-diabetes)
- 848 • Inability to comprehend and/or perform any study-related clinical tests
- 849 • Females who are pregnant, lactating, or intending to become pregnant within the next 30  
850 months.
- 851     ➤ A negative urine pregnancy test will be required for all females who have  
852     experienced menarche.

853  
854 **2.3 Historical Information**

855 Historical information elicited will include the following: date of birth, sex, race, ethnicity,  
856 current refractive correction, iris color (brown or not brown), parental history of myopia (0, 1, or  
857 2 parents), current medication use, history of and current medical conditions, and myopia  
858 treatment history.

859  
860 **2.4 Testing at the Enrollment/Run-in Visit**

861 Testing at the enrollment visit/run-in visit will include the following:  
862

863 1. Standard Refraction

- 864 • The investigator may use his/her standard refraction technique (with or without  
865 cycloplegia) at any time during the visit to ensure that the participant meets eligibility  
866 criteria with respect to refractive correction as described in section 2.5.

867 2. Cycloplegic Autorefraction

- 868 • 1% cyclopentolate – one drop twice to each eye with 5 minutes between drops. The  
869 use of proparacaine prior to the cycloplegic drops is at investigator discretion.
- 870 • Three measurements of sphere, cylinder, and axis will be obtained for each eye using  
871 autorefraction (see manual of procedures). Each measurement will be converted to a  
872 spherical equivalent refractive error (SER) and the mean of the 3 SER values for each  
873 eye will be used for confirming eligibility.

- 874
- 875
- 876
- 877
- 878
- 879
- 880
- 881
- 882
- 883
- A specific autorefractor model is not required for the study; however, each participant should have their autorefraction assessed using the same instrument during the entire study.
  - The cycloplegic autorefraction should occur at 30 minutes  $\pm$  5 minutes from the time the second drop of 1% cyclopentolate was instilled.
  - If eyes are not sufficiently dilated/cyclopleged and/or if the dilation/cycloplegia has worn off before all cycloplegic procedures have been performed, another drop of 1% cyclopentolate may be administered, followed by an additional 30-minute wait before testing. The use of proparacaine prior to this cycloplegic drop is at investigator discretion.

884 3. Axial Length Measurement and Additional Biometry

- 885
- 886
- 887
- 888
- 889
- 890
- 891
- 892
- 893
- 894
- 895
- 896
- One summary reading based on multiple measures with cycloplegia using optical biometry will be documented for the following (see procedures manual):
    - Axial length
    - Flat corneal radius
    - Anterior Chamber depth
    - Lens thickness, if available
  - A specific instrument is not required for the study; however, each participant should have axial length and additional biometry assessments made using the same instrument during the entire study.
  - If eyes are not sufficiently dilated and/or if the dilation has worn off before all cycloplegic procedures have been performed, see procedure for re-dilation in step #2.

897 **2.5 Refractive Correction**

898 To be eligible for randomization, the participant must be wearing refractive correction in each

899 eye (single vision eyeglasses or soft, daily wear single vision contact lenses with any necessary

900 adjustment for contact lens rotation and vertex distance) that meets the following criteria:

- 901
- 902
- 903
- 904
- 905
- 906
- 907
- Myopia (by spherical equivalent) in both eyes must be corrected to within  $\pm 0.50$  D the investigator's cycloplegic measurement of refractive error.
  - Cylinder power in both eyes must be within  $\pm 0.50$  D of the investigator's standard refraction technique, which can be based on a cycloplegic or non-cycloplegic refraction.
  - Cylinder axis for both eyes must be within  $\pm 5$  degrees of the axis found on the investigator's standard refraction when cylinder power is  $\geq 1.00$  D or within  $\pm 15$  degrees when the cylinder power is  $< 1.00$  D.

908 Measurement of refractive error for assessing the above criteria may be performed as an over-

909 refraction or without refractive correction.

910

911 If the participant meets all eligibility criteria for the run-in phase (see section 2.2) but their

912 current correction does not meet the requirements for randomization, then a change in refractive

913 correction can be prescribed in order to meet the requirements when the participant returns for

914 potential randomization. A change in refractive correction can also be prescribed if the

915 investigator elects to change a smaller amount of refractive error, but the resulting prescription

916 must meet the criteria above. The prescribed correction can be single vision eyeglasses or

917 contact lenses. Single vision lenses will be paid for by the study; contact lenses will be at the

918 participants' own expense. A pair of eyeglasses is recommended for all participants.

919

920 **2.6 Treatment in Run-In Phase**

921 Artificial tears will be dispensed in single-use ampules to be used 1 drop to each eye nightly in  
922 each eye for 2-4 weeks. Study personnel will demonstrate for the parent and participant how to  
923 instill a drop in each eye prior to the participant leaving the office.

924  
925 The following will be done to promote compliance with artificial tears during the run-in phase:

- 926 • A calendar log will be provided to the parent on which the participant or parent will  
927 record whether or not the installation was done each night.
- 928 • The parent and participant will be instructed to bring all unused ampules of artificial  
929 tears with them when they return in 2-4 weeks.
- 930 • A smart phone application may be offered to participants and/or parents who provide  
931 consent to be contacted with a nightly prompt asking if the eyedrops were given.

932  
933 Participants will be encouraged to wear refractive correction for all waking hours. The calendar  
934 log used to record artificial tears treatment will also be used to indicate whether refractive  
935 correction was worn each day.



936

937

## Chapter 3: RANDOMIZATION

938

939 The participant should return to assess eligibility for randomization within 2-4 weeks after using  
940 nightly artificial tears wearing the optical correction prescribed at the enrollment visit. If the  
941 participant is unable to return for possible randomization within 6 weeks of enrollment into the  
942 run-in, the participant will be withdrawn from the study.

943

### 3.1 Assessment of Compliance with Artificial Tears

944 Calendar logs will be reviewed to assess the level of compliance with artificial tears eyedrops  
945 during the run-in phase. The number of unused artificial tears eyedrop ampules will be counted.

946

947  
948 To be eligible for randomization, participants must have used artificial tear eyedrops in both eyes  
949 for at least 2 weeks and must have been at least 90% compliant with instilling the drops in both  
950 eyes (days compliant/total days since receiving study medication as evident by review of the  
951 compliance calendar and count of unused ampules) in the run-in phase. Participants not able to  
952 return both the unused ampules of artificial tears eyedrops and the calendar log, and participants  
953 returning the log who are not compliant at least 90% will be withdrawn from the study.

954

955 In addition, the parent (or participant) must demonstrate the ability to instill an eyedrop in both  
956 eyes on their own prior to being considered for randomization. Participants who can't  
957 demonstrate successful instillation of eyedrops (either by themselves or by their parent) will be  
958 withdrawn from the study.

959

### 3.2 Assessment of Compliance with Refractive Correction

960 Calendar logs will be reviewed to assess the level of compliance with refractive correction  
961 during the run-in phase. Compliance with refractive correction will be classified as excellent  
962 (76% to 100% waking hours), good (51% to 75%), fair (26% to 50%), or poor (0 to 25%) based  
963 on investigator judgment after review of the compliance calendar and discussion with parent.  
964 Participants with excellent (greater than 75% compliance) will be eligible for randomization.  
965 Participants 75% compliant or less will be withdrawn from the study.

966

### 3.3 Testing at the Randomization Visit

967  
968  
969 Participants judged to be compliant with eyedrops and refractive correction will have the  
970 following assessed:

971

#### 1. Eye Drop Questionnaire

- 972 • To be completed by the child prior to any other testing to evaluate effect of eye drops  
973 on the child

#### 2. Distance Visual Acuity Testing: Monocular distance visual acuity testing tested at the 974 start of the exam without cycloplegia in current correction meeting the requirements in 975 section 2.5.

- 976 • Measurement of best corrected visual acuity in each eye by a study certified visual  
977 acuity tester using the E-ETDRS testing protocol.

#### 3. Binocular Near Visual Acuity Testing: Binocular near visual acuity is measured using the 978 979 980 981 982 983 984 985 986 987 988 989 990 991 992 993 994 995 996 997 998 999 1000 1001 1002 1003 1004 1005 1006 1007 1008 1009 1010 1011 1012 1013 1014 1015 1016 1017 1018 1019 1020 1021 1022 1023 1024 1025 1026 1027 1028 1029 1030 1031 1032 1033 1034 1035 1036 1037 1038 1039 1040 1041 1042 1043 1044 1045 1046 1047 1048 1049 1050 1051 1052 1053 1054 1055 1056 1057 1058 1059 1060 1061 1062 1063 1064 1065 1066 1067 1068 1069 1070 1071 1072 1073 1074 1075 1076 1077 1078 1079 1080 1081 1082 1083 1084 1085 1086 1087 1088 1089 1090 1091 1092 1093 1094 1095 1096 1097 1098 1099 1100 1101 1102 1103 1104 1105 1106 1107 1108 1109 1110 1111 1112 1113 1114 1115 1116 1117 1118 1119 1120 1121 1122 1123 1124 1125 1126 1127 1128 1129 1130 1131 1132 1133 1134 1135 1136 1137 1138 1139 1140 1141 1142 1143 1144 1145 1146 1147 1148 1149 1150 1151 1152 1153 1154 1155 1156 1157 1158 1159 1160 1161 1162 1163 1164 1165 1166 1167 1168 1169 1170 1171 1172 1173 1174 1175 1176 1177 1178 1179 1180 1181 1182 1183 1184 1185 1186 1187 1188 1189 1190 1191 1192 1193 1194 1195 1196 1197 1198 1199 1200 1201 1202 1203 1204 1205 1206 1207 1208 1209 1210 1211 1212 1213 1214 1215 1216 1217 1218 1219 1220 1221 1222 1223 1224 1225 1226 1227 1228 1229 1230 1231 1232 1233 1234 1235 1236 1237 1238 1239 1240 1241 1242 1243 1244 1245 1246 1247 1248 1249 1250 1251 1252 1253 1254 1255 1256 1257 1258 1259 1260 1261 1262 1263 1264 1265 1266 1267 1268 1269 1270 1271 1272 1273 1274 1275 1276 1277 1278 1279 1280 1281 1282 1283 1284 1285 1286 1287 1288 1289 1290 1291 1292 1293 1294 1295 1296 1297 1298 1299 1300 1301 1302 1303 1304 1305 1306 1307 1308 1309 1310 1311 1312 1313 1314 1315 1316 1317 1318 1319 1320 1321 1322 1323 1324 1325 1326 1327 1328 1329 1330 1331 1332 1333 1334 1335 1336 1337 1338 1339 1340 1341 1342 1343 1344 1345 1346 1347 1348 1349 1350 1351 1352 1353 1354 1355 1356 1357 1358 1359 1360 1361 1362 1363 1364 1365 1366 1367 1368 1369 1370 1371 1372 1373 1374 1375 1376 1377 1378 1379 1380 1381 1382 1383 1384 1385 1386 1387 1388 1389 1390 1391 1392 1393 1394 1395 1396 1397 1398 1399 1400 1401 1402 1403 1404 1405 1406 1407 1408 1409 1410 1411 1412 1413 1414 1415 1416 1417 1418 1419 1420 1421 1422 1423 1424 1425 1426 1427 1428 1429 1430 1431 1432 1433 1434 1435 1436 1437 1438 1439 1440 1441 1442 1443 1444 1445 1446 1447 1448 1449 1450 1451 1452 1453 1454 1455 1456 1457 1458 1459 1460 1461 1462 1463 1464 1465 1466 1467 1468 1469 1470 1471 1472 1473 1474 1475 1476 1477 1478 1479 1480 1481 1482 1483 1484 1485 1486 1487 1488 1489 1490 1491 1492 1493 1494 1495 1496 1497 1498 1499 1500 1501 1502 1503 1504 1505 1506 1507 1508 1509 1510 1511 1512 1513 1514 1515 1516 1517 1518 1519 1520 1521 1522 1523 1524 1525 1526 1527 1528 1529 1530 1531 1532 1533 1534 1535 1536 1537 1538 1539 1540 1541 1542 1543 1544 1545 1546 1547 1548 1549 1550 1551 1552 1553 1554 1555 1556 1557 1558 1559 1560 1561 1562 1563 1564 1565 1566 1567 1568 1569 1570 1571 1572 1573 1574 1575 1576 1577 1578 1579 1580 1581 1582 1583 1584 1585 1586 1587 1588 1589 1590 1591 1592 1593 1594 1595 1596 1597 1598 1599 1600 1601 1602 1603 1604 1605 1606 1607 1608 1609 1610 1611 1612 1613 1614 1615 1616 1617 1618 1619 1620 1621 1622 1623 1624 1625 1626 1627 1628 1629 1630 1631 1632 1633 1634 1635 1636 1637 1638 1639 1640 1641 1642 1643 1644 1645 1646 1647 1648 1649 1650 1651 1652 1653 1654 1655 1656 1657 1658 1659 1660 1661 1662 1663 1664 1665 1666 1667 1668 1669 1670 1671 1672 1673 1674 1675 1676 1677 1678 1679 1680 1681 1682 1683 1684 1685 1686 1687 1688 1689 1690 1691 1692 1693 1694 1695 1696 1697 1698 1699 1700 1701 1702 1703 1704 1705 1706 1707 1708 1709 1710 1711 1712 1713 1714 1715 1716 1717 1718 1719 1720 1721 1722 1723 1724 1725 1726 1727 1728 1729 1730 1731 1732 1733 1734 1735 1736 1737 1738 1739 1740 1741 1742 1743 1744 1745 1746 1747 1748 1749 1750 1751 1752 1753 1754 1755 1756 1757 1758 1759 1760 1761 1762 1763 1764 1765 1766 1767 1768 1769 1770 1771 1772 1773 1774 1775 1776 1777 1778 1779 1780 1781 1782 1783 1784 1785 1786 1787 1788 1789 1790 1791 1792 1793 1794 1795 1796 1797 1798 1799 1800 1801 1802 1803 1804 1805 1806 1807 1808 1809 1810 1811 1812 1813 1814 1815 1816 1817 1818 1819 1820 1821 1822 1823 1824 1825 1826 1827 1828 1829 1830 1831 1832 1833 1834 1835 1836 1837 1838 1839 1840 1841 1842 1843 1844 1845 1846 1847 1848 1849 1850 1851 1852 1853 1854 1855 1856 1857 1858 1859 1860 1861 1862 1863 1864 1865 1866 1867 1868 1869 1870 1871 1872 1873 1874 1875 1876 1877 1878 1879 1880 1881 1882 1883 1884 1885 1886 1887 1888 1889 1890 1891 1892 1893 1894 1895 1896 1897 1898 1899 1900 1901 1902 1903 1904 1905 1906 1907 1908 1909 1910 1911 1912 1913 1914 1915 1916 1917 1918 1919 1920 1921 1922 1923 1924 1925 1926 1927 1928 1929 1930 1931 1932 1933 1934 1935 1936 1937 1938 1939 1940 1941 1942 1943 1944 1945 1946 1947 1948 1949 1950 1951 1952 1953 1954 1955 1956 1957 1958 1959 1960 1961 1962 1963 1964 1965 1966 1967 1968 1969 1970 1971 1972 1973 1974 1975 1976 1977 1978 1979 1980 1981 1982 1983 1984 1985 1986 1987 1988 1989 1990 1991 1992 1993 1994 1995 1996 1997 1998 1999 2000 2001 2002 2003 2004 2005 2006 2007 2008 2009 2010 2011 2012 2013 2014 2015 2016 2017 2018 2019 2020 2021 2022 2023 2024 2025 2026 2027 2028 2029 2030 2031 2032 2033 2034 2035 2036 2037 2038 2039 2040 2041 2042 2043 2044 2045 2046 2047 2048 2049 2050 2051 2052 2053 2054 2055 2056 2057 2058 2059 2060 2061 2062 2063 2064 2065 2066 2067 2068 2069 2070 2071 2072 2073 2074 2075 2076 2077 2078 2079 2080 2081 2082 2083 2084 2085 2086 2087 2088 2089 2090 2091 2092 2093 2094 2095 2096 2097 2098 2099 2100 2101 2102 2103 2104 2105 2106 2107 2108 2109 2110 2111 2112 2113 2114 2115 2116 2117 2118 2119 2120 2121 2122 2123 2124 2125 2126 2127 2128 2129 2130 2131 2132 2133 2134 2135 2136 2137 2138 2139 2140 2141 2142 2143 2144 2145 2146 2147 2148 2149 2150 2151 2152 2153 2154 2155 2156 2157 2158 2159 2160 2161 2162 2163 2164 2165 2166 2167 2168 2169 2170 2171 2172 2173 2174 2175 2176 2177 2178 2179 2180 2181 2182 2183 2184 2185 2186 2187 2188 2189 2190 2191 2192 2193 2194 2195 2196 2197 2198 2199 2200 2201 2202 2203 2204 2205 2206 2207 2208 2209 2210 2211 2212 2213 2214 2215 2216 2217 2218 2219 2220 2221 2222 2223 2224 2225 2226 2227 2228 2229 2230 2231 2232 2233 2234 2235 2236 2237 2238 2239 2240 2241 2242 2243 2244 2245 2246 2247 2248 2249 2250 2251 2252 2253 2254 2255 2256 2257 2258 2259 2260 2261 2262 2263 2264 2265 2266 2267 2268 2269 2270 2271 2272 2273 2274 2275 2276 2277 2278 2279 2280 2281 2282 2283 2284 2285 2286 2287 2288 2289 2290 2291 2292 2293 2294 2295 2296 2297 2298 2299 2300 2301 2302 2303 2304 2305 2306 2307 2308 2309 2310 2311 2312 2313 2314 2315 2316 2317 2318 2319 2320 2321 2322 2323 2324 2325 2326 2327 2328 2329 2330 2331 2332 2333 2334 2335 2336 2337 2338 2339 2340 2341 2342 2343 2344 2345 2346 2347 2348 2349 2350 2351 2352 2353 2354 2355 2356 2357 2358 2359 2360 2361 2362 2363 2364 2365 2366 2367 2368 2369 2370 2371 2372 2373 2374 2375 2376 2377 2378 2379 2380 2381 2382 2383 2384 2385 2386 2387 2388 2389 2390 2391 2392 2393 2394 2395 2396 2397 2398 2399 2400 2401 2402 2403 2404 2405 2406 2407 2408 2409 2410 2411 2412 2413 2414 2415 2416 2417 2418 2419 2420 2421 2422 2423 2424 2425 2426 2427 2428 2429 2430 2431 2432 2433 2434 2435 2436 2437 2438 2439 2440 2441 2442 2443 2444 2445 2446 2447 2448 2449 2450 2451 2452 2453 2454 2455 2456 2457 2458 2459 2460 2461 2462 2463 2464 2465 2466 2467 2468 2469 2470 2471 2472 2473 2474 2475 2476 2477 2478 2479 2480 2481 2482 2483 2484 2485 2486 2487 2488 2489 2490 2491 2492 2493 2494 2495 2496 2497 2498 2499 2500 2501 2502 2503 2504 2505 2506 2507 2508 2509 2510 2511 2512 2513 2514 2515 2516 2517 2518 2519 2520 2521 2522 2523 2524 2525 2526 2527 2528 2529 2530 2531 2532 2533 2534 2535 2536 2537 2538 2539 2540 2541 2542 2543 2544 2545 2546 2547 2548 2549 2550 2551 2552 2553 2554 2555 2556 2557 2558 2559 2560 2561 2562 2563 2564 2565 2566 2567 2568 2569 2570 2571 2572 2573 2574 2575 2576 2577 2578 2579 2580 2581 2582 2583 2584 2585 2586 2587 2588 2589 2590 2591 2592 2593 2594 2595 2596 2597 2598 2599 2600 2601 2602 2603 2604 2605 2606 2607 2608 2609 2610 2611 2612 2613 2614 2615 2616 2617 2618 2619 2620 2621 2622 2623 2624 2625 2626 2627 2628 2629 2630 2631 2632 2633 2634 2635 2636 2637 2638 2639 2640 2641 2642 2643 2644 2645 2646 2647 2648 2649 2650 2651 2652 2653 2654 2655 2656 2657 2658 2659 2660 2661 2662 2663 2664 2665 2666 2667 2668 2669 2670 2671 2672 2673 2674 2675 2676 2677 2678 2679 2680 2681 2682 2683 2684 2685 2686 2687 2688 2689 2690 2691 2692 2693 2694 2695 2696 2697 2698 2699 2700 2701 2702 2703 2704 2705 2706 2707 2708 2709 2710 2711 2712 2713 2714 2715 2716 2717 2718 2719 2720 2721 2722 2723 2724 2725 2726 2727 2728 2729 2730 2731 2732 2733 2734 2735 2736 2737 2738 2739 2740 2741 2742 2743 2744 2745 2746 2747 2748 2749 2750 2751 2752 2753 2754 2755 2756 2757 2758 2759 2760 2761 2762 2763 2764 2765 2766 2767 2768 2769 2770 2771 2772 2773 2774 2775 2776 2777 2778 2779 2780 2781 2782 2783 2784 2785 2786 2787 27



983 4. Binocular Amplitude of Accommodation: Measured with a study-specified and provided  
984 accommodation near-point rule (e.g. Gulden’s near-point rule) and the participant in their  
985 current spectacle or contact lens correction.  
986

987 Cycloplegic autorefraction, axial length and additional biometric assessments (following the  
988 same procedure as described for enrollment in section 2.4) must be repeated if the enrollment  
989 visit was completed more than 4 weeks (>28 days) prior to randomization. If repeated, these will  
990 be considered the participant’s “baseline” measurements; otherwise the measurements from the  
991 enrollment/run-in phase visit will be considered the “baseline” measurements.  
992

### 993 **3.4 Confirmation of Eligibility for Randomization**

994 Visual acuity testing to assess eligibility for randomization must be performed in the  
995 participant’s current refractive correction.  
996

997 Randomization will occur at the conclusion of the randomization exam after confirming that the  
998 participant meets the following eligibility criteria:  
999

- 1000 • Best-corrected distance visual acuity in current correction meeting the following criteria:
    - 1001 ○ 20/32 or better in each eye ( $\geq 76$  letters by E-ETDRS testing)
    - 1002 ○ Interocular difference  $\leq 0.2$  logMAR ( $\leq 10$  letters by E-ETDRS testing)
    - 1003
  - 1004 • Refractive error meeting the following by cycloplegic *autorefraction (only if repeated on*  
1005 *day of randomization)*:
    - 1006 ○ Myopia -1.00D to -6.00D spherical equivalent (SE) in both eyes
    - 1007 ○ Astigmatism  $\leq 1.50$ D in both eyes
    - 1008 ○ Anisometropia  $< 1.00$ D SE
    - 1009
  - 1010 • Refractive correction that is being worn for each eye (single vision eyeglasses or contact  
1011 lenses with any necessary adjustment for contact lens rotation and vertex distance) must  
1012 meet the following criteria:
    - 1013 ○ Myopia (by spherical equivalent) in both eyes must be corrected to within  $\pm 0.50$   
1014 D of the investigator’s cycloplegic measurement of refractive error.
    - 1015 ○ Cylinder power in both eyes must be within  $\pm 0.50$  D of the investigator’s standard  
1016 refraction technique, which can be based on a cycloplegic or non-cycloplegic  
1017 refraction.
    - 1018 ○ Cylinder axis for both eyes must be within  $\pm 5$  degrees of the axis found on the  
1019 investigator’s refraction when cylinder power is  $\geq 1.00$  D or within  $\pm 15$  degrees  
1020 when the cylinder power is  $< 1.00$  D.
- 1021 Measurement of refractive error for assessing the above criteria may be performed as an  
1022 over-refraction or without refractive correction.
- 1023 • Compliant with artificial tears eyedrops during run-in phase (*see definition in section 3.1*)
  - 1024 • Compliant with refractive correction during run-in phase (*see definition in section 3.2*).  
1025

1026 Participants who do not meet eligibility criteria will be withdrawn from the study without being  
1027 randomized.  
1028

1029 Prior to randomization, the study requirements should again be discussed with the parent so that  
1030 site staff have reasonable assurance that the participant will be adherent to the protocol.

1031  
1032  
1033  
1034  
1035  
1036  
1037  
1038  
1039  
1040  
1041  
1042  
1043  
1044  
1045  
1046  
1047  
1048  
1049  
1050  
1051  
1052  
1053  
1054

### **3.5 Randomization**

Eligible participants will be randomly assigned 2:1 to the atropine (0.01%) or placebo group (administering one drop nightly for 24 months), respectively, using a permuted block design stratified by iris color (brown vs non-brown) and by site. The number of participants randomized who self-report as East Asian ethnicity will be limited to no more than 25% of the overall sample (n=47 participants).

A participant is officially enrolled in the randomized trial when the website randomization process is completed.

Once a participant is randomized, that participant will be included in the analysis regardless of whether the assigned treatment is received or not. Participants will remain in the study for 30 months of follow-up. Thus, the investigator must not randomize a participant until he/she is convinced that the parent/participant remains willing to participate and will accept either of the treatment regimens and complete follow-up as previously discussed at enrollment.

Treatment must commence within 1 week following randomization; therefore, a participant should not be randomized until both the investigator and parent are ready to start treatment.

The participant, parents, coordinators, testers and investigators will be masked to treatment group. If the need arises, the investigator may become unmasked after discussion of a specific case with the protocol chair in response to any adverse events.

## Chapter 4: TREATMENT AND FOLLOW-UP IN RANDOMIZED TRIAL

### 4.1 Study Medication

Nevakar is manufacturing the study drug (0.01% atropine) and placebo and packaging both in identical-appearing single-use ampules. In addition to 0.01% atropine, the ampules contain a buffer similar to artificial tears while the placebo contains just the buffer similar to artificial tears. The atropine and placebo ampules are sent to a central pharmacy, which will label and package multiple atropine or placebo ampules into three month supply packages to maintain masking. The packages of ampules will be shipped to participating sites in insulated shipping boxes designed to maintain study drug at 59 to 77 degrees F during shipping. Participating sites will store study drug at room temperature (between 68 and 77 degrees F) prior to dispensing study medication packages to study participants. Additional study medication details are summarized within a separate investigational product manual.

### 4.2 Treatment 0 to 24 Months

Treatment with study medication will be one drop in both eyes each night, including the night before study visits. Participants who are wearing contact lenses will be instructed to remove contact lenses before administering eyedrops and wait at least 30 minutes after eyedrop administration before reinserting contact lenses.

During the first 24 months of the study, no myopia progression prevention treatment other than the study eyedrops is permitted.

### 4.3 Telephone Calls

Two weeks following randomization ( $\pm 3$  days), the site will contact parents to question the parent as to whether the child is experiencing any issues with treatment.

At three months following randomization ( $\pm 1$  month), the site will contact parents to encourage compliance and question the parent as to whether the child is experiencing any issues with treatment.

The site coordinator will make phone calls in between office visits at 9, 15, 21, and 27 months following randomization ( $\pm 1$  month). These calls will be conducted to maintain direct contact with the parents of each participant, to develop and maintain rapport with the participant and/or family, and to assist with the scheduling of study visits if needed.

### 4.4 Masking of Treatment Group

Cycloplegic autorefraction, axial length, and additional biometry will be measured by a masked examiner at all follow-up visits using the same instrumentation on the participant throughout the study. Masking will be accomplished by having site personnel administer cyclopentolate to both eyes of each participant and wait 30 minutes before he/she sees the masked examiner. The masked examiner may be a technician or an investigator and must be certified to complete these measurements.

### 4.5 Compliance with Study Treatment

Unused study medication ampules will be brought to all visits while on randomized treatment and will be counted as a measure of treatment compliance.

1103 To promote compliance with eyedrops, a calendar will be provided on which the child/parent  
1104 will record the treatment received each day. At each visit, an assessment of compliance will be  
1105 recorded on the Follow-up Examination Form after review of the calendars and an interview with  
1106 the parent and child.

1107  
1108 If a participant is noncompliant with study eyedrops, the parents and participants should be  
1109 encouraged to persist with their efforts to treat to the best of their ability.  
1110

#### 1111 **4.6 Off-Treatment Phase >24 to 30 Months**

1112 At the 24-month visit, study eyedrops will be discontinued and no myopia treatment other than  
1113 optical correction should be prescribed prior to the 30-month visit.  
1114

#### 1115 **4.7 Side Effects of Treatment**

1116 Reporting of adverse events is described in Chapter 6. In cases of vision-related adverse events,  
1117 distance visual acuity should be measured using the E-ETDRS testing protocol (see section 4.8).  
1118 Prior to deviating from the treatment protocol or prescribing non-protocol treatment, the situation  
1119 should be discussed with the Protocol Chair.  
1120

#### 1121 **4.8 Follow-up Visit Schedule in Randomized Trial**

1122 The follow-up visit schedule consists of the following office visits timed from randomization:

- 1123 • 6 months  $\pm$  2 weeks\*
- 1124 • 12 months  $\pm$  2 weeks\*
- 1125 • 18 months  $\pm$  2 weeks\*
- 1126 • 24 months  $\pm$  4 weeks: On-Treatment Primary Outcome – discontinue treatment after visit
- 1127 • 30 months  $\pm$  4 weeks: Off-Treatment Secondary Outcome – six months following  
1128 discontinuation of treatment

1129  
1130 \*A virtual visit may be completed at 6, 12, or 18-months if an in-person office visit cannot be  
1131 completed by the participant. If any safety events are identified during a virtual visit, participants will  
1132 have additional follow up as applicable.  
1133

1134 Additional visits may be scheduled at investigator discretion. Adverse event data may be reported  
1135 and collected at any time during the study.  
1136

#### 1137 **4.9 Follow-up Visit Testing Procedures**

1138 At each office visit the following tests and assessments will be done with the participant wearing  
1139 their current refractive correction:  
1140

- 1141 1. Medical History - including questioning about the occurrence of adverse effects of treatment.  
1142 Concomitant medications will be recorded, as well as current eyeglasses or contact lenses  
1143 correction.
- 1144 2. Compliance Assessment
  - 1145 • All unused study medication ampules since the last visit (if brought to the visit) will  
1146 be counted as a measure of compliance.
  - 1147 • Home calendar logs (if brought to the visit) will be reviewed and assessments of  
1148 compliance with eyedrops and with refractive correction will be recorded on the  
1149 Follow-up Examination Form

- 1150 3. Eye Drop Questionnaire (all follow up visits except the 30-month visit)  
 1151 • To be completed by the child prior to any other testing to evaluate the effect of eye  
 1152 drops on the child.
- 1153 4. Distance Visual Acuity Testing (30-month visit only): Monocular distance visual acuity  
 1154 tested at the start of the exam without cycloplegia in current correction.  
 1155 • Measurement of best corrected visual acuity in each eye by a study certified visual  
 1156 acuity tester using the E-ETDRS testing protocol.  
 1157 • If the vision is more than one line ( $\geq 5$  letters) worse than baseline, retest using trial  
 1158 frames or phoropter with the most recent subjective refraction.
- 1159 5. Binocular Near Visual Acuity Testing (6-month visit only): Binocular near visual acuity is  
 1160 measured using the ATS4 Near Acuity Test with participant wearing current refractive  
 1161 correction prior to administration of cycloplegia.
- 1162 6. Binocular Amplitude of Accommodation: Measured in their current correction without  
 1163 cycloplegia with a study-specified and provided accommodation near-point rule (e.g.  
 1164 Gulden's near-point rule).
- 1165 7. Standard Refraction  
 1166 • The investigator may use their standard refraction technique (with or without  
 1167 cycloplegia) at any time during the visit to ensure that refractive correction meets  
 1168 study criteria at each visit (see section 4.9 below).  
 1169 • At 30-month visit, only required if the vision is more than one line ( $\geq 5$  letters)  
 1170 worse than baseline.
- 1171 8. Following cycloplegia, at all visits an examiner masked to treatment group will perform:  
 1172 • Cycloplegic Autorefraction – (see section 2.4)  
 1173 • Cycloplegic Axial Length Measurement and Additional Biometry (see section 2.4)

1175 If a virtual visit is completed, only items 1 through 3 above will be completed. If any safety events  
 1176 are identified during a virtual visit, participants will have additional follow up as applicable.  
 1177

1178 In addition, females who have experienced menarche will undergo a urine pregnancy test at each  
 1179 follow up visit except the 30-month visit (or at home if a virtual visit is completed).  
 1180

- 1181 • In the case of pregnancy during the study, study eyedrops will be discontinued although  
 1182 the subject will be retained in the study.  
 1183

#### 1184 **4.10 Management of Refractive Error**

1185 Spectacle or contact lenses correction must be updated whenever the investigator's standard  
 1186 refraction technique reveals a change in refractive error. A change in refractive error is defined  
 1187 as any of the following amounts:  
 1188

- 1189 • A difference of  $\geq 0.75$  D sphere
- 1190 • A difference of  $\geq 0.75$  D cylinder
- 1191 • A difference of  $\geq 0.50$  D in SE anisometropia
- 1192 • A difference in axis of 6 degrees or more when the cylinder is  $\geq 1.00$  D.  
 1193

1194 Whether to update the correction for smaller differences in refraction is at investigator discretion.  
 1195 Glasses required by a contact lens user should be updated when their contact lenses are updated,  
 1196 and these glasses will be paid for by the study.

1197  
1198 If updated, the refractive correction must meet the requirements described in section 2.5.  
1199  
1200 Daily wear single vision contact lenses may be used for correction of refractive error full time or  
1201 alternating with spectacle correction. Contact lenses should not differ from a cycloplegic over-  
1202 refraction by more than +/- 0.50D SE. Uncorrected astigmatism should not exceed 1.00D.  
1203 OrthoK, rigid gas permeable, and other contact lenses being used to affect myopia progression  
1204 are not allowed. Contacts must be removed from the eyes prior to study medication  
1205 administration and not reinserted for at least 30 minutes.  
1206

#### 1207 **4.11 Non-Randomized Treatment Other than Refractive Correction**

1208 Non-randomized treatment for myopia other than changes in refractive error as described above  
1209 is not permitted during the study. The investigator must call the protocol chair to discuss the  
1210 case and obtain approval for an exception prior to initiating non-randomized treatment (including  
1211 OrthoK, rigid gas permeable, and other contact lenses being prescribed to affect myopia  
1212 progression).  
1213

#### 1214 **4.12 General Considerations**

1215 The study is being conducted in compliance with the policies described in the study policies  
1216 document, with the ethical principles that have their origin in the Declaration of Helsinki, with  
1217 the protocol described herein, and with the standards of Good Clinical Practice.  
1218

1219 There is no restriction on the number of participants to be enrolled by each site towards the  
1220 overall recruitment goal.  
1221

1222  
1223 **Chapter 5: MISCELLANEOUS CONSIDERATIONS IN FOLLOW-UP**  
1224

1225 **5.1 Participant Withdrawals**

1226 Parents may withdraw their child from the study at any time. If the parents indicate that they  
1227 want to withdraw their child from the study, the investigator should attempt to speak with the  
1228 parents personally to determine the reason. If their interest is in transferring the child's care to  
1229 another eye care provider, every effort should be made to comply with this and at the same time  
1230 try to keep the participant in the study under the new provider's care.

1231  
1232 **5.2 Discontinuation of Study**

1233 The study may be discontinued by the Steering Committee (with approval of the Data and Safety  
1234 Monitoring Committee) prior to the pre-planned completion of enrollment and follow-up for all  
1235 participants.

1236  
1237 **5.3 Travel Reimbursement**

1238 The parent of each participant will be compensated \$50 (by merchandise/money card or check)  
1239 upon completion of the enrollment exam, the randomization exam, and each study visit at 6, 12,  
1240 18, 24, and 30 months following randomization, for a maximum of \$350. If there are  
1241 extenuating circumstances and/or the participant is unable to complete study visits without  
1242 additional funds due to travel costs, additional funds may be provided.

1243  
1244 **5.4 Costs Covered by the Study**

1245 The study will pay for the office visits that are part of the study (enrollment, randomization visit,  
1246 and visits at 6, 12, 18, 24, and 30 months). The study will pay for virtual visits. Any other visits  
1247 that are part of routine care will be the parent(s) or their insurance company's responsibility.

1248  
1249 The study will pay for the following:

- 1250 • Study eyedrops (artificial tears, atropine and placebo) will be provided to the participants  
1251 at no cost.
- 1252 • Eyeglasses will be provided at enrollment (if needed), and at 12 and 24-month visits if  
1253 obtained from a study optician.
- 1254 • Lens changes will be provided at 6 and 18-month visits if a change is required (see  
1255 Section 4.10) and the lenses are obtained from a study optician.
- 1256 • The study will pay for bifocals (progressive-addition lenses) if prescribed by the  
1257 investigator because of difficulties seeing up close when doing schoolwork or reading.

1258  
1259 **5.5 Costs Not Covered by the Study**

1260 The study will not pay for eyeglasses obtained from a non-study optician. The study will not pay  
1261 for contact lenses.



## Chapter 6: ADVERSE EVENTS AND RISKS

1263  
1264  
1265  
1266  
1267  
1268  
1269  
1270  
1271  
1272  
1273  
1274  
1275  
1276  
1277  
1278  
1279  
1280  
1281  
1282  
1283  
1284  
1285  
1286  
1287  
1288  
1289  
1290  
1291  
1292  
1293  
1294  
1295  
1296  
1297  
1298  
1299  
1300  
1301  
1302  
1303  
1304  
1305  
1306  
1307  
1308  
1309

The study will be performed under an Investigation New Drug Application to the FDA of the US. Specific reporting requirements for adverse events are summarized below.

### 6.1 Recording of Adverse Events

The participant and parent will be queried as to whether or not they have experienced ocular side effects of treatment including lid/conjunctival irritation, light sensitivity, or near blur and/or reading difficulty; as well as any systemic side effects of treatment presenting within one hour following administration of atropine, including dry skin/mouth, tachycardia, fever, flushing, irritability, mental confusion, constipation, aggravation of asthma, or seizures. In addition, all serious adverse events will be recorded.

The study investigator will assess the relationship of each adverse event to be *related* or *unrelated* by deciding if there is a reasonable possibility that the adverse event may have been caused by the treatment.

To ensure consistency of adverse event causality assessments, investigators should apply the following general guideline when determining whether an adverse event is related:

#### Yes

There is a plausible temporal relationship between the onset of the adverse event and administration of the study treatment and the adverse event cannot be readily explained by the participant's clinical state, intercurrent illness, or concomitant therapies; and/or the adverse event follows a known pattern of response to the study treatment.

#### No

Evidence exists that the adverse event has an etiology other than the study treatment (e.g., preexisting medical condition, underlying disease, intercurrent illness, or concomitant medication); and/or the adverse event has no plausible temporal relationship to study treatment administration.

The maximum intensity that occurred since the onset of an adverse event will be rated on a three-point scale: (1) mild, (2) moderate, or (3) severe, categorized as follows:

Mild - Symptom(s) barely noticeable to participant or does not make participant uncomfortable; does not influence performance or functioning; prescription drug not ordinarily needed for relief of symptom(s).

Moderate - Symptom(s) of sufficient severity to make participant uncomfortable; performance of daily activity is influenced; participant is able to continue in study; treatment for symptom(s) may be needed.

Severe - Symptom(s) cause severe discomfort; severity may cause cessation of treatment with study medication or device; treatment for symptom(s) may be given and/or participant hospitalized.



1310 It is emphasized that the term severe is a measure of intensity: thus, a severe adverse event is not  
1311 necessarily serious. For example, itching for several days may be rated as severe, but may not be  
1312 clinically serious.

1313  
1314 Adverse events that continue after the study participant's discontinuation or completion of the  
1315 study will be followed until their medical outcome is determined or until no further change in the  
1316 condition is expected.

## 1317 1318 **6.2 Reporting Serious or Unexpected Adverse Events**

1319 A serious adverse event is any untoward occurrence that:

- 1320 • Results in death.
- 1321 • Is life-threatening; (a non-life-threatening event which, had it been more severe, might  
1322 have become life-threatening, is not necessarily considered a serious adverse event).
- 1323 • Requires inpatient hospitalization or prolongation of existing hospitalization.
- 1324 • Results in persistent or significant disability/incapacity or substantial disruption of the  
1325 ability to conduct normal life functions (sight-threatening).
- 1326 • Is a congenital anomaly/birth defect.
- 1327 • Is considered a significant medical event by the investigator based on medical judgment  
1328 (e.g., may jeopardize the participant or may require medical/surgical intervention to  
1329 prevent one of the outcomes listed above).

1330  
1331 Unexpected adverse events are those that are not identified in the current Clinical Investigator's  
1332 Brochure.

1333  
1334 Serious or unexpected adverse events must be reported to the Coordinating Center immediately  
1335 via completion of the online serious adverse event form.

1336  
1337 The Coordinating Center will notify all participating investigators of any adverse event that is  
1338 both serious and unexpected. Notification will be made within 10 days after the Coordinating  
1339 Center becomes aware of the event.

1340  
1341 Each principal investigator is responsible for reporting serious study-related adverse events and  
1342 abiding by any other reporting requirements specific to their Institutional Review Board.

## 1343 1344 **6.3 Data and Safety Monitoring Committee Review of Adverse Events**

1345 A Data and Safety Monitoring Committee will approve the protocol, template informed consent  
1346 form, and substantive amendments, and provide independent monitoring of adverse events.  
1347 Cumulative adverse event data will be tabulated for review by the DSMC at intervals determined  
1348 by the coordinating center and the DSMC. Following each DSMC data review, a summary will  
1349 be made available for submission to Institutional Review Boards.

## 1350 1351 **6.4 Risks**

### 1352 **6.4.1 Risks of Examination Procedures**

1353 The procedures in this study are part of daily eye care practice in the United States and pose no  
1354 additional risks.

1355

1356 **6.4.2 Risk of Atropine Therapy**

1357 The effects of long-term use of bilateral atropine eye drops when used as treatment for myopia  
1358 progression depend on the strength of atropine used. Side effects are uncommon with the 0.01%  
1359 dosage to be used in this protocol, based on a series of 84 participants treated with 0.01%  
1360 atropine for 2 years (ATOM2). In most cases the events were deemed not related to the  
1361 treatment. Six children had eye symptoms felt related to the therapy, 1 case of irritation and 1  
1362 case of blurred vision in the 0.01% group. Further treatment for two additional years was not  
1363 associated with side-effects.

1364

1365 A common side effect of atropine 1% is blurry vision, particularly at near, which may cause  
1366 problems with reading at school and near work. The 0.01% dosage used in this study is not  
1367 expected to be frequently associated with reading problems or blur at near.

1368

1369 Following atropine administration, local side effects of minimal severity include allergic lid  
1370 reactions, local irritation, conjunctival hyperemia, and follicular conjunctivitis. In the ATOM2  
1371 series, 1% of participants had irritation sufficient to warrant discontinuation of treatment; no  
1372 cases of allergic conjunctivitis or allergic dermatitis were reported.

1373

1374 Potential systemic side effects include dry skin and mouth, tachycardia, fever, flushing and  
1375 irritability. These effects were not reported (ATOM2), but rather some more minor complaints  
1376 such as blurring and some light sensitivity with atropine 0.1% and 0.5% in the first two years of  
1377 treatment. The only severe adverse event with 0.01% was 1 participant (1%) with acute gastric  
1378 pain which was not felt to be related to the atropine (ATOM2).

1379

1380 Atropine 1% produces dilation of the pupil, which increases the light that enters the eye.

1381 Although it has not been demonstrated that atropine used for 2 years could have harmful ocular  
1382 effects, excessive exposure to light theoretically could be toxic to the retina. The strength used  
1383 in this study is expected to have minimal effect on pupil dilation.<sup>39</sup> If there is light sensitivity,  
1384 clip-on or flip-up sunglasses or photochromic lenses will be provided. The use of hats with  
1385 brims or visors will be encouraged along with sunglasses.

1386

1387 Participants who experience problems with schoolwork or significant symptoms when reading  
1388 may be prescribed progressive bifocals paid for by the study. These will be provided irrespective  
1389 of treatment assignment after consultation with the protocol chair.

1390

1391 Atropine in various dosages from 0.01% to 1% has been used long-term to prevent the  
1392 progression of myopia without any lasting adverse effect on visual acuity.<sup>32, 41, 49, 50</sup> In the  
1393 ATOM2 trial, the most common side effect in the 0.01% atropine group was loss of one or more  
1394 lines of distance visual acuity (13%) but this was reversible upon discontinuing medication.

1395

1396 If a participant develops adverse effects serious enough to discontinue study medication prior to  
1397 the 24-month on-treatment primary outcome exam, the Investigator should call the Protocol  
1398 Chair to discuss the case. Progressive lenses should be tried for near focusing problems before  
1399 stopping therapy. Reading glasses may be prescribed for participants using contact lenses. If  
1400 study medication is discontinued, the participant will continue in follow-up.

1401

1402 In the case of pregnancy during the study, study eyedrops will be discontinued although the  
1403 subject will be retained in the study.

1404 **6.4.3 Risk Assessment**

1405 The Jaeb Center Institutional Review Board has classified the protocol as research involving  
1406 greater than minimal risk using the federal definition under 45 CFR 46.102i.

## Chapter 7: SAMPLE SIZE ESTIMATION AND STATISTICAL ANALYSIS

The approach to sample size and statistical analyses are summarized below. A detailed statistical analysis plan will be written and finalized without knowledge of study data. The analysis plan synopsis in this chapter contains the framework of the anticipated final analysis plan.

### 7.1 Primary Objective: Efficacy on Atropine Treatment (24 Months)

The primary objective is to determine the efficacy of atropine for slowing progression of myopia after 24 months of treatment.

#### 7.1.1 Primary Analysis – Refractive Error at 24 Months (On-Treatment)

The primary analysis will be a treatment group comparison of change from baseline to 24-months in spherical equivalent refractive error (SER), as measured by a masked examiner using cycloplegic autorefraction, using a longitudinal discrete time mixed model, which allows for interaction between time and treatment group, and adjusts for baseline SER, age, iris color (brown vs. non-brown) and East Asian vs. non-East Asian race, to account for potential residual confounding and improve power for the treatment comparison. At baseline and all follow-up visits, including the 24-month visit, the mean of the three readings from autorefraction in each eye will be calculated and then the mean of both eyes for each participant will be used for the analysis. If fewer than 3 readings are available in each eye, the mean of available readings will be used for each eye to obtain the mean of both eyes for each participant. The baseline SER will be included in the analysis model as an adjustment factor, while the change in SER at all follow-up visits up to and including the 24-month visit will be included in the longitudinal outcome vector. Further details, including handling of missing data, will be included in the Statistical Analysis Plan.

The treatment group difference (atropine – placebo) and a 95% confidence interval will be calculated based on the model estimates at 24 months.

The primary analysis will follow the intention-to-treat principle. All randomized participants will be analyzed according to their randomized treatment group regardless of whether/what treatment was received, including non-randomized treatment for myopia (section 4.109).

##### 7.1.1.1 Sensitivity Analyses

As a sensitivity analysis, the primary analysis will be repeated using an analysis of covariance model (ANCOVA) model in which SER at 24 months is adjusted for SER at baseline. Multiple imputation with the Monte Carlo Markov Chain (MCMC) method will be used to impute missing change in SER for participants who missed the 24-month visit or did not complete cycloplegic autorefraction testing at the 24-month visit. In addition, change in SER will also be imputed for participants who start non-randomized treatment.

#### 7.1.2 Secondary Outcomes at 24 Months (On-Treatment)

Each secondary analysis below will be conducted using the same approaches as defined above for the primary analysis unless otherwise specified.

##### 7.1.2.1 Proportion of Participants with Progression $\geq 2D$ at 24 Months

The relative risk of progression of myopia SER  $\geq 2D$  from baseline between participants in the atropine group and the placebo group will be estimated using a Cox proportional hazards model,

1455 which adjusts for baseline SER, age, iris color (brown vs. non-brown) and East Asian vs. non-  
1456 East Asian race. An alternative analysis method will be used if the proportional hazards  
1457 assumption is not met.

#### 1458 1459 **7.1.2.2 Change in Axial Length at 12 and 24 Months**

1460 Axial length will be reported as the distributions of baseline length, 12-month length, 24-month  
1461 length, and change in axial length from baseline to 12 and 24 months. A treatment group  
1462 comparison of the change from baseline to 12 months and 24 months in axial length will be  
1463 performed using a longitudinal discrete time mixed model, which allows for interaction between  
1464 time and treatment group, and adjusts for baseline axial length, age, iris color (brown vs. non-  
1465 brown) and East Asian vs. non-East Asian race. At baseline and all follow-up visits, including  
1466 the 12 and 24-month visits, the mean of the axial length readings in both eyes for each  
1467 participant will be used for the analysis. The treatment group difference (atropine – placebo) and  
1468 a 95% confidence interval will be calculated based on the model estimates at 12 months and 24  
1469 months.

#### 1470 1471 **7.1.2.3 Compliance**

1472 Compliance with study medication will be assessed at the 6-month, 12-month, 18-month, and 24-  
1473 outcome exams. For each of these exams, the distribution of number of calendar days that study  
1474 medication was reported used and the distribution of the number of unused study medication  
1475 ampules will be compared between treatment groups.

1476  
1477 Compliance with refractive correction will be assessed at every follow up visit. After discussion  
1478 with the parent and child, study personnel will classify the proportion of time refractive error was  
1479 worn will be described as excellent (76% to 100%), good (51% to 75%), fair (26% to 50%), or  
1480 poor ( $\leq 25\%$ ). The distribution of refractive correction compliance will be compared between  
1481 treatment groups.

#### 1482 1483 **7.1.3 Secondary Outcomes at 12 Months (On-Treatment)**

1484 Each secondary analysis below will be conducted using the same approaches as defined above  
1485 for the primary analysis unless otherwise specified.

##### 1486 1487 **7.1.3.1 Refractive Error at 12 Months**

1488 The model used for the primary analysis at 24 months will also be used to perform a treatment  
1489 group comparison of change from baseline to 12-months in spherical equivalent refractive error  
1490 (SER), as measured by a masked examiner using cycloplegic autorefraction.

##### 1491 1492 **7.1.3.2 Proportion of Participants with Progression $\geq 1D$ at 12 Months**

1493 The relative risk of progression of myopia SER  $\geq 1D$  from baseline between participants in the  
1494 atropine group and the placebo group will be estimated using a Cox proportional hazards model,  
1495 adjusting for baseline SER, age, iris color (brown vs. non-brown) and East Asian vs. non-East  
1496 Asian race. An alternative analysis method will be used if the proportional hazards assumption is  
1497 not met.

#### 1498 1499 **7.2 Secondary Objective: Efficacy off Atropine Treatment (30 Months)**

1500 The secondary objective of the study is to determine the efficacy of atropine treatment for  
1501 slowing progression of myopia after a period of 6 months off treatment. All analyses as  
1502 described in section 7.1 above will be repeated using data from the 30-month off-treatment visit.

1503  
1504  
1505  
1506  
1507  
1508  
1509  
1510  
1511  
1512  
1513  
1514  
1515  
1516  
1517  
1518  
1519  
1520  
1521  
1522  
1523  
1524  
1525  
1526  
1527  
1528  
1529  
1530  
1531  
1532  
1533  
1534  
1535  
1536  
1537  
1538  
1539  
1540  
1541  
1542  
1543  
1544  
1545  
1546  
1547  
1548

## **7.3 Additional Analyses**

### **7.3.1 Treatment Effect in Subgroups**

The treatment difference for spherical equivalent refractive error (SER) change from baseline to 24 and 30 months within the following subgroups will be explored:

- Baseline SER
- Brown iris versus non-brown iris
- Race/ethnicity
- Baseline age
- Baseline age and baseline SER

These planned subgroup analyses will repeat the primary analysis, including the baseline factor and the baseline factor by treatment interaction. In general, statistical power will be low for detection of interactions unless the interaction is very large.

Subgroup analyses will be interpreted with caution, particularly if the corresponding overall analysis does not demonstrate a significant treatment group difference.

### **7.3.2 Treatment Effect over Time**

The treatment effect on change in spherical equivalent refractive error (SER) from baseline through the first year will be compared with the treatment effect on change in SER from end of first year through the second year, by constructing the appropriate contrasts in the primary analysis model.

### **7.3.3 Exploratory Analyses of Additional Ocular Biometric Parameters**

As exploratory analyses at 24 and 30 months, change in flat corneal radius, anterior chamber depth, and lens thickness will each be compared between treatment groups at 24 and 30 months using a longitudinal discrete time mixed model which allows for interaction between time and treatment group, and adjusts for the baseline value of the parameter, age, iris color (brown vs. non-brown), and East Asian vs. non-East Asian race.

## **7.4 Safety Analyses**

### **7.4.1 Adverse Effects of Eye Drops**

An eyedrops questionnaire will be administered at randomization and at each follow-up visit except the 30-month visit. The distribution of scores on each survey item will be summarized by treatment group at the time of randomization and at each follow-up exam up until and including the 24-month visit. The average of the item responses at the 24-month visit will be calculated and compared with a t-test for difference in means between treatment groups.

### **7.4.2 Visual Acuity**

The proportion of participants with loss of best corrected distance vision >1 logMAR line at 30 months in either eye will be compared between treatment groups using Barnard's test. The proportion of participants with loss of best corrected near binocular vision >1 logMAR line at 6 months will be compared between treatment groups using Barnard's test.



1549 **7.5 Need for Bifocals**

1550 The proportion of participants needing bifocals in both groups will be evaluated.

1551

1552 **7.6 Interim Analysis**

1553 As specified by the DSMC, the decision of whether an interim analysis will be conducted will be  
1554 evaluated after 6 months of recruitment and before any outcome data is reviewed. An interim  
1555 monitoring plan will be developed at that point if circumstances warrant.

1556

1557 **7.7 Data Tabulations and Other Analyses**

1558 The following tabulations will be performed according to treatment group:

- 1559 • Baseline demographics and clinical characteristics
- 1560 • A flow chart accounting for all participants for all visits and phone calls
- 1561 • Visit and phone contact completion rates for each follow-up visit
- 1562 • Protocol deviations

1563

1564 **7.8 Sample Size**

1565 **7.8.1 General Considerations**

1566 The goal of this section is to summarize data from prior studies of myopia progression, use these  
1567 data to formulate assumptions about the expected treatment effect and its standard deviation, and  
1568 to calculate the sample size needed to provide at least 90% power for each of the 2 hypothesis  
1569 tests corresponding to the 24-month on treatment (primary) and 30-month off-treatment  
1570 secondary objectives.

1571

1572 To collect more safety data from participants using atropine, sample size was based on a 2:1  
1573 allocation (2 participants will be randomized to the atropine group for every 1 participant  
1574 randomized to the placebo group).

1575

1576 **7.8.2 Sample Size for Primary Objective: Efficacy on Atropine Treatment**

1577

1578 **Comparison of SER at 24 months**

1579 Sample size calculations for the on-treatment comparison of refractive error at 24 months were  
1580 based upon data from the CLEERE group and ATOM1 for untreated participants meeting similar  
1581 eligibility criteria, and data from participants treated with atropine 0.01% in the ATOM2 study.<sup>28,</sup>  
1582 <sup>31, 51</sup> The participants in these studies were 6 to <13 years old with refractive error of -1.00D to -  
1583 6.00D spherical equivalent and astigmatism of -1.50D or less. The ATOM1 and ATOM2 studies  
1584 were conducted in Asian populations whereas the race/ethnicity of participants in the CLEERE  
1585 study was more reflective of the US population.

1586

- 1587 • In 404 untreated participants from CLEERE (N=214) and ATOM1 (N=190), the mean  
1588 progression after 24 months was 1.12D (95% CI = 1.05 to 1.18D) with standard deviation  
1589 (SD) of 0.69D (95% CI = 0.65 to 0.75D).

1590

- 1591 • In 75 participants treated with 0.01% atropine from ATOM2, the mean progression after  
1592 24 months was 0.49D (95% CI = 0.35 to 0.63D) with SD of 0.60D (95% CI = 0.52 to  
1593 0.72).

1594

1595 The on-treatment effect after 24 months in our study is estimated to be 0.50D based on a  
 1596 conservative estimate of 1.00D 24-month progression in untreated participants and an estimated  
 1597 0.50D 24-month progression in participants treated with 0.01% atropine.

1598  
 1599 Assuming a conservative standard deviation of 0.80D (based on CLEERE), and using a 2-sided  
 1600 t-test with alpha = 0.05, a sample size of 123 participants (82 in the atropine group and 41 in the  
 1601 placebo group) is needed to detect a difference in mean change in SER (atropine – placebo) at 24  
 1602 months with 90% power, assuming the true mean difference is 0.50D or larger (Table 1).  
 1603 Since the correlation between baseline refractive error and change in refractive error at 24  
 1604 months in the CLEERE data was low (r=0.05), no reduction in sample size was taken to account  
 1605 for the correlation between baseline and the outcome at 24 or 30 months. Accounting for up to  
 1606 10% loss to follow-up over 24 months, the sample size *for this objective* is 138 participants  
 1607 overall (92 in the atropine group and 46 in the placebo group).

1609 **Table 1: Total Sample Size Estimates for Various Treatment Group Differences in Mean**  
 1610 **SER Score at 24 Months or 30 Months\***

| Standard Deviation<br>Mean SER Change<br>from Baseline to<br>24 Months or 30<br>Months(D) | True Treatment Group Difference (D)<br>in Mean SER Change between Baseline and 24 Months or 30 Months |              |             |             |
|-------------------------------------------------------------------------------------------|-------------------------------------------------------------------------------------------------------|--------------|-------------|-------------|
|                                                                                           | 0.40                                                                                                  | 0.50         | 0.60        | 0.625       |
| 0.60                                                                                      | 111 (74:37)                                                                                           | 72 (144:72)  | 51 (34:17)  | 48 (32:16)  |
| 0.70                                                                                      | 147 (98:49)                                                                                           | 96 (64:32)   | 69 (46:23)  | 63 (42:21)  |
| 0.80                                                                                      | 192 (128:64)                                                                                          | 123 (82:41)  | 87 (58:29)  | 81 (54:27)  |
| 0.90                                                                                      | 243 (162:81)                                                                                          | 156 (104:52) | 111 (74:37) | 102 (68:34) |
| 1.00                                                                                      | 300 (200:100)                                                                                         | 192 (128:64) | 135 (90:45) | 123 (82:41) |

1611 Cells indicate total sample size needed assuming a 2:1 randomization. (Numbers in parenthesis reflect number  
 1612 needed in each group atropine:placebo).

1613 \*Sample sizes based on a t-test to evaluate a difference between treatment groups in mean change from baseline at  
 1614 24-months, with a 2-sided alpha=0.05, and power=90%.

1615

### 1616 7.8.3 Sample Size for Secondary Objective: Efficacy off Atropine Treatment

1617

#### 1618 Comparison of SER at 30 months

1619 In CLEERE, the mean progression after 36 months was 1.50D in 127 untreated participants  
 1620 (95% CI = 1.34 to 1.66 D) with a SD of 0.89D (95% CI = 0.79 to 1.02 D). If the rate of  
 1621 progression in our study is similar (approximately 0.25D every 6 months), then the progression  
 1622 rate between baseline and 30-months in placebo participants is estimated to be 1.25D.

1623

1624 In ATOM2, the 71 participants who stopped atropine at 24 months progressed a mean of 0.28D  
 1625 (SD = 0.33D) after 12 months off treatment (95% CI for mean change = 0.20 to 0.36 D); and  
 1626 their mean progression from baseline to 36 months was 0.72D (95% CI = 0.55 to 0.89 D) with  
 1627 SD of 0.72D (95% CI = 0.62 to 0.86 D).

1628

1629 If atropine group participants progress at the same rate as ATOM2 participants between 24 and  
 1630 30 months

1631 If atropine participants progress at the same rate as ATOM2 participants between 24 and 30  
 1632 months (estimated to be about 0.125 D over six months), then the estimated progression rate



1633 between baseline and 30-months in the atropine group is 0.625D (0.50D at 24 months plus  
1634 0.125D between 24 and 30 months). Compared with the estimated 1.25D progression rate in the  
1635 placebo group between baseline and 30-months (based on CLEERE data), the treatment group  
1636 difference would be expected to be 0.625D in favor of the atropine group.

1637  
1638 Assuming a slightly larger standard deviation of 0.90D at 30-months, and using a 2-sided t-test  
1639 with  $\alpha = 0.05$ , a sample size of 102 participants (68 in the atropine group and 34 in the  
1640 placebo group) is needed to detect a mean difference in SER (atropine – placebo) at 30 months  
1641 with 90% power, if the magnitude of the true mean difference is 0.625D or larger (Table 1).  
1642 Accounting for up to 15% loss to follow-up over 30 months, the sample size *for this objective* is  
1643 120 participants overall (80 in the atropine group and 40 in the placebo group) under this  
1644 scenario.

1645  
1646 *If atropine group participants progress at the same rate as placebo participants in CLEERE*  
1647 *between 24 and 30 months*

1648 If atropine participants progress at the same rate as placebo participants in CLEERE (i.e. no  
1649 treatment effect) between 24 and 30 months (0.25D), then the estimated progression rate  
1650 between baseline and 30-months in the atropine group is 0.75D (0.50D at 24 months plus 0.25D  
1651 between 24 and 30 months). Compared with the estimated 1.25D progression rate in the placebo  
1652 group between baseline and 30-months (based on CLEERE data), the treatment group difference  
1653 would be expected to be 0.50D in favor of the atropine group.

1654  
1655 Assuming a slightly larger standard deviation of 0.90D at 30-months, and using a 2-sided t-test  
1656 with  $\alpha = 0.05$ , a sample size of 156 participants (104 in the atropine group and 52 in the  
1657 placebo group) is needed to detect a mean difference in SER (atropine – placebo) at 30 months  
1658 with 90% power, if the magnitude of the true mean difference is 0.50D or larger (Table 1).  
1659 Accounting for up to 15% loss to follow-up over 30 months, the sample size *for this objective* is  
1660 186 participants overall (124 in the atropine group and 62 in the placebo group) under this  
1661 scenario.

1662  
1663 **7.8.4 Summary of Sample Size Estimation**

1664 To be conservative, sample size for the study was chosen based upon the comparison of SER at  
1665 30 months (secondary objective) assuming that atropine group participants will progress at the  
1666 same rate as placebo between 24 and 30 months and that expected treatment group difference  
1667 between baseline and 30 months will be 0.50D, the scenario which has the largest sample size  
1668 requirement.

1669  
1670 The total sample size for the study will be 186 participants (124 in the atropine group and 62 in  
1671 the placebo group).

1672  
1673 **7.8.5 Precision within Racial Subgroups**

1674 Table 2 below summarizes the expected  $\frac{1}{2}$ -width of a 2-sided 95% confidence interval on the  
1675 treatment group difference of myopia progression for the exploratory analysis within subgroups  
1676 defined by race/ethnicity with an overall sample size of 156 participants completing the 30-  
1677 month primary outcome exam.

1678  
1679 For example: if participants of East Asian race/ethnicity make up 25% of the total sample (26 in  
1680 atropine group and 13 in placebo group) and the standard deviation of progression in this group

1681 is 0.80D, then the expected width of 2-sided 95% confidence interval for the treatment group  
 1682 difference in East Asians is  $\pm 0.55D$ .

1683

1684 **Table 2. Expected width of 2-sided 95% confidence interval on the treatment group**  
 1685 **comparison of myopia progression as a function of the standard deviation of progression**  
 1686 **and sample size per race/ethnicity subgroup\***

| Race/Ethnicity Subgroup as Proportion of Total Sample Size | Standard Deviation of Mean SER Change from Baseline** (D) |            |            |            |            |            |            |
|------------------------------------------------------------|-----------------------------------------------------------|------------|------------|------------|------------|------------|------------|
|                                                            | 0.8                                                       | 0.9        | 1.0        | 1.1        | 1.2        | 1.3        | 1.4        |
| 10% n=15                                                   | $\pm 0.95$                                                | $\pm 1.06$ | $\pm 1.18$ | $\pm 1.30$ | $\pm 1.42$ | $\pm 1.54$ | $\pm 1.66$ |
| 20% n=30                                                   | $\pm 0.63$                                                | $\pm 0.71$ | $\pm 0.79$ | $\pm 0.87$ | $\pm 0.95$ | $\pm 1.03$ | $\pm 1.11$ |
| 25% n=39                                                   | $\pm 0.55$                                                | $\pm 0.62$ | $\pm 0.69$ | $\pm 0.76$ | $\pm 0.83$ | $\pm 0.89$ | $\pm 0.96$ |
| 30% n=48                                                   | $\pm 0.49$                                                | $\pm 0.55$ | $\pm 0.62$ | $\pm 0.68$ | $\pm 0.74$ | $\pm 0.80$ | $\pm 0.86$ |
| 40% n=63                                                   | $\pm 0.43$                                                | $\pm 0.48$ | $\pm 0.53$ | $\pm 0.59$ | $\pm 0.64$ | $\pm 0.69$ | $\pm 0.75$ |
| 50% n=78                                                   | $\pm 0.38$                                                | $\pm 0.43$ | $\pm 0.48$ | $\pm 0.53$ | $\pm 0.57$ | $\pm 0.62$ | $\pm 0.67$ |
| 60% n=93                                                   | $\pm 0.35$                                                | $\pm 0.39$ | $\pm 0.44$ | $\pm 0.48$ | $\pm 0.52$ | $\pm 0.57$ | $\pm 0.61$ |
| 70% n=108                                                  | $\pm 0.32$                                                | $\pm 0.36$ | $\pm 0.40$ | $\pm 0.45$ | $\pm 0.49$ | $\pm 0.53$ | $\pm 0.57$ |
| 80% n=126                                                  | $\pm 0.30$                                                | $\pm 0.34$ | $\pm 0.37$ | $\pm 0.41$ | $\pm 0.45$ | $\pm 0.49$ | $\pm 0.52$ |
| 90% n=141                                                  | $\pm 0.28$                                                | $\pm 0.32$ | $\pm 0.35$ | $\pm 0.39$ | $\pm 0.42$ | $\pm 0.46$ | $\pm 0.49$ |

1687

1688 \*Cells show the expected  $\frac{1}{2}$ -width of 2-sided 95% confidence interval on the treatment group comparison of myopia  
 1689 progression as a function of the standard deviation of progression and sample size per race/ethnicity subgroup.

1690

1691 \*\*The range of standard deviation was based on the standard deviation of progression in CLEERE group data at 36-  
 1692 months, stratified by race/ethnicity group. At 36 months, the standard deviations of progression in Asian, Black,  
 1693 Hispanic, and White populations were 1.02D (95% CI =0.82 to 1.36D), 0.61D (95% CI =0.47 to 0.88D), 0.82D  
 1694 (95% CI =0.67 to 1.05D), and 0.92D (95% CI =0.70 to 1.36D) respectively.

1695

## Chapter 8: DATA COLLECTION AND MONITORING

1696  
1697  
1698  
1699  
1700  
1701  
1702  
1703  
1704  
1705  
1706  
1707  
1708  
1709  
1710  
1711  
1712  
1713  
1714  
1715  
1716  
1717  
1718  
1719  
1720  
1721  
1722  
1723  
1724  
1725  
1726  
1727  
1728  
1729  
1730  
1731  
1732  
1733  
1734  
1735  
1736  
1737  
1738

### 8.1 Case Report Forms and Device Data

The main study data are collected through electronic case report forms (CRFs). These electronic CRFs from the study website are considered the primary source documentation.

When data are directly collected in electronic case report forms, this will be considered the source data. Each participating site will maintain appropriate medical and research records for this trial, in compliance with ICH E6 and regulatory and institutional requirements for the protection of confidentiality of participants.

### 8.2 Study Records Retention

Study documents will be retained for a minimum of 3 years following the submission of the final financial report for the last grant cycle for which the study is conducted or 2 years following the date a marketing application is approved for the drug for the indication for which it is being investigated; or if not approved, 2 years after the IND is withdrawn, whichever is later. No records will be destroyed without the written consent of the sponsor. It is the responsibility of the sponsor to inform the investigators when study documents no longer need to be retained.

### 8.3 Quality Assurance and Monitoring

Designated personnel from the Coordinating Center will be responsible for maintaining quality assurance (QA) and quality control (QC) systems to ensure that the clinical portion of the trial is conducted and data are generated, documented and reported in compliance with the protocol, Good Clinical Practice (GCP) and the applicable regulatory requirements. Adverse events will be prioritized for monitoring.

A risk-based monitoring (RBM) plan will be developed and revised as needed during the course of the study, consistent with the FDA “Guidance for Industry Oversight of Clinical Investigations — A Risk-Based Approach to Monitoring” (August 2013). Study conduct and monitoring will conform with 21 Code of Federal Regulations (CFR) 812.

The data of most importance for monitoring at the site are participant eligibility and adverse events. Therefore, the RBM plan will focus on these areas. As much as possible, remote monitoring will be performed in real-time with on-site monitoring performed to evaluate the verity and completeness of the key site data. Elements of the RBM may include:

- Qualification assessment, training, and certification for sites and site personnel
- Oversight of Institutional Review Board (IRB) coverage and informed consent procedures
- Central (remote) data monitoring: validation of data entry, data edits/audit trail, protocol review of entered data and edits, statistical monitoring, study closeout
- On-site monitoring (site visits): source data verification, site visit report
- Communications with site staff
- Patient retention and visit completion
- Quality control reports

- 1739 • Management of noncompliance
- 1740 • Documenting monitoring activities
- 1741 • Adverse event reporting and monitoring

1742 Coordinating Center representatives or their designees may visit the study facilities at any time in  
1743 order to maintain current and personal knowledge of the study through review of the records,  
1744 comparison with source documents, observation and discussion of the conduct and progress of  
1745 the study.

1746  
1747 **8.4 Protocol Deviations**

1748 A protocol deviation is any noncompliance with the clinical trial protocol, GCP, or procedure  
1749 requirements. The noncompliance may be either on the part of the participant, the investigator,  
1750 or the study site staff. As a result of deviations, corrective actions are to be developed by the site  
1751 and implemented promptly.

1752  
1753 The site PI/study staff is responsible for knowing and adhering to their IRB requirements.  
1754 Further details about the handling of protocol deviations will be included in the monitoring plan.  
1755  
1756

1757 **Chapter 9: ETHICS/PROTECTION OF HUMAN PARTICIPANTS**

1758  
1759 **9.1 Ethical Standard**

1760 The investigator will ensure that this study is conducted in full conformity with Regulations for  
1761 the Protection of Human Participants of Research codified in 45 CFR Part 46, 21 CFR Part 50,  
1762 21 CFR Part 56, and/or the ICH E6.

1763  
1764 **9.2 Institutional Review Boards**

1765 The protocol, informed consent form(s), recruitment materials, and all participant materials will  
1766 be submitted to the IRB for review and approval. Approval of both the protocol and the  
1767 consent/assent forms must be obtained before any participant is enrolled. Any amendment to the  
1768 protocol will require review and approval by the IRB before the changes are implemented to the  
1769 study. All changes to the consent and/or assent form will be IRB approved; a determination will  
1770 be made regarding whether previously consented participants need to be re-consented.

1771  
1772 **9.3 Informed Consent Process**

1773 **9.3.1 Consent Procedures and Documentation**

1774 Informed consent (and assent if required) is a process that is initiated prior to the parent and child  
1775 agreeing to participate in the study and continues throughout the individual's study participation.  
1776 Extensive discussion of risks and possible benefits of participation will be provided to the  
1777 participants and their families. Consent forms and assent forms if required will be IRB-approved  
1778 and the parent and child if required will be asked to read and review the document. The  
1779 investigator will explain the research study to the parent and child and answer any questions that  
1780 may arise. All parent(s) will receive a verbal explanation in terms suited to their comprehension  
1781 of the purposes, procedures, and potential risks of the study and of their child's rights as research  
1782 participants. Parent(s) will have the opportunity to carefully review the written consent form and  
1783 ask questions prior to signing.

1784  
1785 The parent(s) and child should have the opportunity to discuss the study with their surrogates or  
1786 think about it prior to agreeing to participate. The parent will sign the informed consent  
1787 document prior to any procedures being done specifically for the study. The participants may  
1788 withdraw consent at any time throughout the course of the trial. A copy of the informed consent  
1789 document will be given to the participants for their records. The rights and welfare of the  
1790 participants will be protected by emphasizing to them that the quality of their medical care will  
1791 not be adversely affected if they decline to participate in this study.

1792  
1793 **9.3.2 Participant and Data Confidentiality**

1794 Participant confidentiality is strictly held in trust by the participating investigators, their staff,  
1795 and the sponsor(s) and their agents. Therefore, the study protocol, documentation, data, and all  
1796 other information generated will be held in strict confidence. No information concerning the  
1797 study or the data will be released to any unauthorized third party without prior written approval  
1798 of the sponsor.

1799  
1800 The study monitor, other authorized representatives of the Jaeb Center for Health Research, or  
1801 representatives of the IRB may inspect all documents and records required to be maintained by  
1802 the investigator, including but not limited to, medical records (office, clinic, or hospital) and  
1803 pharmacy records for the participants in this study. The clinical study site will permit access to  
1804 such records.

1805 The study participant's contact information will be securely stored at each clinical site for  
1806 internal use during the study. At the end of the study, all records will continue to be kept in a  
1807 secure location for as long a period as dictated by local IRB and Institutional regulations.  
1808 Study participant research data, which is for purposes of statistical analysis and scientific  
1809 reporting, will be transmitted to and stored at the Jaeb Center for Health Research. Individual  
1810 participants and their research data will be identified by a unique study identification number.

1811  
1812 The study data entry and study management systems used by clinical sites and by the Jaeb Center  
1813 for Health Research Coordinating Center research staff will be secured and password protected.  
1814 At the end of the study, all study databases will be de-identified and archived at the Jaeb Center  
1815 for Health Research and made available to the public.

1816

1817

## Chapter 10: REFERENCES

1818

- 1819 1. Pan CW, Ramamurthy D, Saw SM. Worldwide prevalence and risk factors for myopia.  
1820 Ophthalmic & Physiological Optics 2012;32(1):3-16.
- 1821 2. Eye Diseases Prevalence Research Group. The prevalence of refractive errors among  
1822 adults in the United States, Western Europe, and Australia. Archives of Ophthalmology  
1823 2004;122(4):495-505.
- 1824 3. Foster PJ, Jiang Y. Epidemiology of myopia. Eye (Lond) 2014;28(2):202-8.
- 1825 4. French AN, Morgan IG, Burlutsky G, et al. Prevalence and 5- to 6-year incidence and  
1826 progression of myopia and hyperopia in Australian schoolchildren. Ophthalmology  
1827 2013;120(7):1482-91.
- 1828 5. Giordano L, Friedman DS, Repka MX, et al. Prevalence of refractive error among  
1829 preschool children in an urban population: the Baltimore Pediatric Eye Disease Study.  
1830 Ophthalmology 2009;116(4):739-46.
- 1831 6. Multi-Ethnic Pediatric Eye Disease Study Group. Prevalence of myopia, hyperopia, and  
1832 astigmatism in non-Hispanic white and Asian children: multi-ethnic pediatric eye disease  
1833 study. Ophthalmology 2013;120(10):2109-16.
- 1834 7. Multi-Ethnic Pediatric Eye Disease Study Group. Prevalence of myopia and hyperopia in  
1835 6- to 72-month-old african american and Hispanic children: the multi-ethnic pediatric eye  
1836 disease study. Ophthalmology 2010;117(1):140-7.
- 1837 8. Vitale S, Sperduto RD, Ferris FL, 3rd. Increased prevalence of myopia in the United  
1838 States between 1971-1972 and 1999-2004. Archives of Ophthalmology  
1839 2009;127(12):1632-9.
- 1840 9. Xiang F, He M, Morgan IG. The impact of parental myopia on myopia in Chinese  
1841 children: population-based evidence. Optometry and Vision Science 2012;89(10):1487-  
1842 96.
- 1843 10. Lam CS, Edwards M, Millodot M, Goh WS. A 2-year longitudinal study of myopia  
1844 progression and optical component changes among Hong Kong schoolchildren.  
1845 Optometry and Vision Science 1999;76(6):370-80.
- 1846 11. Fan DS, Lam DS, Lam RF, et al. Prevalence, incidence, and progression of myopia of  
1847 school children in Hong Kong. Investigative Ophthalmology & Visual Science  
1848 2004;45(4):1071-5.
- 1849 12. Edwards MH, Li RW, Lam CS, et al. The Hong Kong progressive lens myopia control  
1850 study: study design and main findings. Investigative Ophthalmology & Visual Science  
1851 2002;43(9):2852-8.
- 1852 13. Grodum K, Heijl A, Bengtsson B. Refractive error and glaucoma. Acta Ophthalmologica  
1853 Scandinavica 2001;79(6):560-6.
- 1854 14. Tano Y. Pathologic myopia: where are we now? American Journal of Ophthalmology  
1855 2002;134(5):645-60.
- 1856 15. Willis JR, Vitale S, Morse L, et al. The Prevalence of Myopic Choroidal  
1857 Neovascularization in the United States: Analysis of the IRIS((R)) Data Registry and  
1858 NHANES. Ophthalmology 2016;123(8):1771-82.
- 1859 16. Walline JJ, Lindsley K, Vedula SS, et al. Interventions to slow progression of myopia in  
1860 children. Cochrane Database of Systematic Reviews 2011(12):CD004916.
- 1861 17. Huang J, Wen D, Wang Q, et al. Efficacy Comparison of 16 Interventions for Myopia  
1862 Control in Children: A Network Meta-analysis. Ophthalmology 2016;123(4):697-708.



- 1863 18. Sherwin JC, Reacher MH, Keogh RH, et al. The association between time spent outdoors  
1864 and myopia in children and adolescents: a systematic review and meta-analysis.  
1865 *Ophthalmology* 2012;119(10):2141-51.
- 1866 19. Sherwin JC, Hewitt AW, Coroneo MT, et al. The association between time spent  
1867 outdoors and myopia using a novel biomarker of outdoor light exposure. *Investigative*  
1868 *Ophthalmology & Visual Science* 2012;53(8):4363-70.
- 1869 20. Guo Y, Liu LJ, Xu L, et al. Outdoor activity and myopia among primary students in rural  
1870 and urban regions of Beijing. *Ophthalmology* 2013;120(2):277-83.
- 1871 21. Derby H. On the atropine treatment of acquired and progressive myopia. *Transactions of*  
1872 *the American Ophthalmological Society* 1874;2:139-54.
- 1873 22. Cooper J, Schulman E, Jamal N. Current status on the development and treatment of  
1874 myopia. *Optometry* 2012;83(5):179-99.
- 1875 23. Prepas SB. Light, literacy and the absence of ultraviolet radiation in the development of  
1876 myopia. *Medical Hypotheses* 2008;70(3):635-7.
- 1877 24. Wollensak G, Iomdina E, Dittert DD, et al. Cross-linking of scleral collagen in the rabbit  
1878 using riboflavin and UVA. *Acta Ophthalmologica Scandinavica* 2005;83(4):477-82.
- 1879 25. Yen MY, Liu JH, Kao SC, Shiao CH. Comparison of the effect of atropine and  
1880 cyclopentolate on myopia. *Annals of Ophthalmology* 1989;21(5):180-182, 187.
- 1881 26. Shih YF, Chen CH, Chou AC, et al. Effects of different concentrations of atropine on  
1882 controlling myopia in myopic children. *Journal of Ocular Pharmacology and*  
1883 *Therapeutics* 1999;15(1):85-90.
- 1884 27. Shih YF, Hsiao CK, Chen CJ, et al. An intervention trial on efficacy of atropine and  
1885 multi-focal glasses in controlling myopic progression. *Acta Ophthalmologica*  
1886 *Scandinavica* 2001;79(3):233-6.
- 1887 28. Chua WH, Balakrishnan V, Chan YH, et al. Atropine for the treatment of childhood  
1888 myopia. *Ophthalmology* 2006;113(12):2285-91.
- 1889 29. Chia A, Chua WH, Cheung YB, et al. Atropine for the treatment of childhood myopia:  
1890 safety and efficacy of 0.5%, 0.1%, and 0.01% doses (Atropine for the Treatment of  
1891 Myopia 2). *Ophthalmology* 2012;119(2):347-54.
- 1892 30. Loh KL, Lu Q, Tan D, Chia A. Risk factors for progressive myopia in the Atropine  
1893 Therapy for Myopia Study. *American Journal of Ophthalmology* 2015;159(5):945-9.
- 1894 31. Chia A, Lu QS, Tan D. Five-Year Clinical Trial on Atropine for the Treatment of Myopia  
1895 2: Myopia Control with Atropine 0.01% Eyedrops. *Ophthalmology* 2016;123(2):391-9.
- 1896 32. Brodstein RS, Brodstein DE, Olson RJ, et al. The treatment of myopia with atropine and  
1897 bifocals: a long-term prospective study. *Ophthalmology* 1984;91:1373-9.
- 1898 33. Tong L, Huang XL, Koh AL, et al. Atropine for the treatment of childhood myopia:  
1899 effect on myopia progression after cessation of atropine. *Ophthalmology*  
1900 2009;116(3):572-9.
- 1901 34. Chia A, Chua WH, Wen L, et al. Atropine for the treatment of childhood myopia:  
1902 changes after stopping atropine 0.01%, 0.1% and 0.5%. *Am J Ophthalmol*  
1903 2014;157(2):451-7 e1.
- 1904 35. Chen KK, Poth EJ. Racial differences as illustrated by the mydriatic action of cocaine,  
1905 euphthalmine, and ephedrine. *The Journal of Pharmacology and Experimental*  
1906 *Therapeutics* 1929;36:429-45.
- 1907 36. Emiru VP. Response to mydriatics in the African. *British Journal of Ophthalmology*  
1908 1971;55(8):538-43.
- 1909 37. Salazar M, Shimada K, Patil PN. Iris pigmentation and atropine mydriasis. *Journal of*  
1910 *Pharmacology and Experimental Therapeutics* 1976;197(1):79-88.



- 1911 38. Li SM, Wu SS, Kang MT, et al. Atropine slows myopia progression more in Asian than  
1912 white children by meta-analysis. *Optometry and Vision Science* 2014;91(3):342-50.
- 1913 39. Cooper J, Eisenberg N, Schulman E, Wang FM. Maximum atropine dose without clinical  
1914 signs or symptoms. *Optometry and Vision Science* 2013;90(12):1467-72.
- 1915 40. Loughman J, Flitcroft DI. The acceptability and visual impact of 0.01% atropine in a  
1916 Caucasian population. *Br J Ophthalmol* 2016.
- 1917 41. Kennedy RH, Dyer JA, Kennedy MA, et al. Reducing the progression of myopia with  
1918 atropine: a long term cohort study of Olmsted County students. *Binocular Vision &  
1919 Strabismus Quarterly* 2000;15:281-304.
- 1920 42. Wu PC, Yang YH, Fang PC. The long-term results of using low-concentration atropine  
1921 eye drops for controlling myopia progression in schoolchildren. *Journal of Ocular  
1922 Pharmacology and Therapeutics* 2011;27(5):461-6.
- 1923 43. Lee JJ, Fang PC, Yang IH, et al. Prevention of myopia progression with 0.05% atropine  
1924 solution. *J Ocul Pharmacol Ther* 2006;22(1):41-6.
- 1925 44. Fang PC, Chung MY, Yu HJ, Wu PC. Prevention of myopia onset with 0.025% atropine  
1926 in premyopic children. *J Ocul Pharmacol Ther* 2010;26(4):341-5.
- 1927 45. Tideman JW, Snabel MC, Tedja MS, et al. Association of Axial Length With Risk of  
1928 Uncorrectable Visual Impairment for Europeans With Myopia. *JAMA Ophthalmol*  
1929 2016;134(12):1355-63.
- 1930 46. Flitcroft DI. The complex interactions of retinal, optical and environmental factors in  
1931 myopia aetiology. *Prog Retin Eye Res* 2012;31(6):622-60.
- 1932 47. Vongphanit J, Mitchell P, Wang JJ. Prevalence and progression of myopic retinopathy in  
1933 an older population. *Ophthalmology* 2002;109(4):704-11.
- 1934 48. Bedrossian RH. The effect of atropine on myopia. *Ophthalmology* 1979;86(5):713-9.
- 1935 50. Chiang MF, Kouzis A, Pointer RW, Repka MX. Treatment of childhood myopia with  
1936 atropine eyedrops and bifocal spectacles. *Binocular Vision & Strabismus Quarterly*  
1937 2001;16(3):209-15.
- 1938 51. Collaborative Longitudinal Evaluation of Ethnicity and Refractive Error (CLEERE)  
1939 Study Group. Unpublished data provided through personal communications with PEDIG.  
1940 2016.
- 1941
