# Supplementary material
Source: PubMed Central journal article supplement (PMC10346510)
Supplement: jamaophthalmol-e232855-s004.pdf [file jamaophthalmol-e232855-s004.pdf]

\*Indicates required information. Only first name, last name, and suffix will appear in PubMed.

| <b>*Group Name(s): The Pediatric Eye Disease Investigator Group</b> |                   |                              |                         |                                                        |                                                 |                                                                |                                                                                                   |
|---------------------------------------------------------------------|-------------------|------------------------------|-------------------------|--------------------------------------------------------|-------------------------------------------------|----------------------------------------------------------------|---------------------------------------------------------------------------------------------------|
| <b>*First Name and Middle Initial(s)</b>                            | <b>*Last Name</b> | <b>*Suffix (eg, Jr, III)</b> | <b>Academic Degrees</b> | <b>Institution</b>                                     | <b>Location (city, state/province, country)</b> | <b>Role or Contribution, eg, chair, principal investigator</b> | <b>Group (if more than 1 Group listed in the byline) and/or Subgroup (eg, Steering Committee)</b> |
| Denise D.                                                           | Alexopoulos       |                              |                         | Illinois College of Optometry                          | Chicago, IL                                     | Examiner                                                       |                                                                                                   |
| Megan                                                               | Allen             |                              |                         | Illinois College of Optometry                          | Chicago, IL                                     | Investigator                                                   |                                                                                                   |
| Heather A.                                                          | Anderson          |                              |                         | University of Houston College of Optometry             | Houston, TX                                     | Investigator                                                   |                                                                                                   |
| Darrell S.                                                          | Austin            |                              |                         | The Jaeb Center for Health Research                    | Tampa, FL                                       | Coordinating Center                                            |                                                                                                   |
| Shane C.                                                            | Black             |                              |                         | Pediatric Ophthalmology Associates                     | Columbus, OH                                    | Coordinator                                                    |                                                                                                   |
| Nicole M.                                                           | Boyle             |                              |                         | The Jaeb Center for Health Research                    | Tampa, FL                                       | Coordinating Center                                            |                                                                                                   |
| Grant Andrew                                                        | Casey             |                              |                         | Casey Eye Institute Oregon Health & Science University | Portland, OR                                    | Examiner                                                       |                                                                                                   |
| Moriah Adine                                                        | Chandler          |                              |                         | University of Houston College of Optometry             | Houston, TX                                     | Examiner                                                       |                                                                                                   |
| Ryan                                                                | Chinn             |                              |                         | Boston Children's Hospital                             | Boston, MA                                      | Examiner                                                       |                                                                                                   |
| Deborah A.                                                          | Clausius          |                              |                         | Ticho Eye Associates                                   | Chicago Ridge, IL                               | Coordinator                                                    |                                                                                                   |
| Beth J.                                                             | Colon             |                              |                         | Eye Care Associates, Inc.                              | Poland, OH                                      | Examiner                                                       |                                                                                                   |
| Courtney L.                                                         | Conner            |                              |                         | The Jaeb Center for Health Research                    | Tampa, FL                                       | Coordinating Center                                            | Planning Committee                                                                                |
| Linda T.                                                            | Curtis            |                              |                         | The Emory Eye Center                                   | Atlanta, GA                                     | Coordinator                                                    |                                                                                                   |
| Zainab                                                              | Dinani            |                              |                         | Eye Care Associates, Inc.                              | Poland, OH                                      | Examiner                                                       |                                                                                                   |
| Quayleen                                                            | Donahue           |                              |                         | The Jaeb Center for Health Research                    | Tampa, FL                                       | Coordinating Center                                            |                                                                                                   |
| Michelle                                                            | Dubois            |                              |                         | Casey Eye Institute Oregon Health & Science University | Portland, OR                                    | Examiner                                                       |                                                                                                   |
| Patricia L.                                                         | Evans             |                              |                         | The Jaeb Center for Health Research                    | Tampa, FL                                       | Coordinating Center                                            |                                                                                                   |
| Brooke P.                                                           | Fimbel            |                              |                         | The Jaeb Center for Health Research                    | Tampa, FL                                       | Coordinating Center                                            |                                                                                                   |
| Melanie Kay                                                         | Fowler            |                              |                         | The Emory Eye Center                                   | Atlanta, GA                                     | Examiner                                                       |                                                                                                   |
| Richard P.                                                          | Golden            |                              |                         | Pediatric Ophthalmology Associates                     | Columbus, OH                                    | Investigator                                                   |                                                                                                   |
| Beth G.                                                             | Harper            |                              |                         | University of Houston College of Optometry             | Houston, TX                                     | Examiner                                                       |                                                                                                   |
| Robert J.                                                           | Henderson         |                              |                         | The Jaeb Center for Health Research                    | Tampa, FL                                       | Coordinating Center                                            |                                                                                                   |
| Dieu-Hong                                                           | Ho                |                              |                         | University of Houston College of Optometry             | Houston, TX                                     | Examiner                                                       |                                                                                                   |
| James E.                                                            | Hoepner           |                              |                         | The Jaeb Center for Health Research                    | Tampa, FL                                       | Coordinating Center                                            |                                                                                                   |
| Kristine B.                                                         | Hopkins           |                              |                         | University of Alabama Birmingham School of Optometry   | Birmingham, AL                                  | Investigator                                                   |                                                                                                   |
| Ashli S.                                                            | Jenks             |                              |                         | Ticho Eye Associates                                   | Chicago Ridge, IL                               | Examiner                                                       |                                                                                                   |
| Joseph D.                                                           | Kaplon            |                              |                         | The Jaeb Center for Health Research                    | Tampa, FL                                       | Coordinating Center                                            |                                                                                                   |
| Shabana                                                             | Khan              |                              |                         | Eye Care Associates, Inc.                              | Poland, OH                                      | Coordinator                                                    |                                                                                                   |
| Cassandra A.                                                        | Koutnik           |                              |                         | Ticho Eye Associates                                   | Chicago Ridge, IL                               | Investigator                                                   |                                                                                                   |

## Supplemental Online Content: Nonauthor Collaborators

\*Indicates required information. Only first name, last name, and suffix will appear in PubMed.

| *First Name and Middle Initial(s) | *Last Name | *Suffix (eg, Jr, III) | Academic Degrees | Institution                                            | Location (city, state/province, country) | Role or Contribution, eg, chair, principal investigator | Group (if more than 1 Group listed in the byline) and/or Subgroup (eg, Steering Committee) |
|-----------------------------------|------------|-----------------------|------------------|--------------------------------------------------------|------------------------------------------|---------------------------------------------------------|--------------------------------------------------------------------------------------------|
| Annie F.                          | Kuo        |                       |                  | Casey Eye Institute Oregon Health & Science University | Portland, OR                             | Investigator                                            |                                                                                            |
| Jessy                             | Lee        |                       |                  | Casey Eye Institute Oregon Health & Science University | Portland, OR                             | Coordinator                                             |                                                                                            |
| Muriel M.                         | Martinez   |                       |                  | University of Houston College of Optometry             | Houston, TX                              | Investigator                                            |                                                                                            |
| Sophia M.                         | Marusic    |                       |                  | Boston Children's Hospital                             | Boston, MA                               | Coordinator                                             |                                                                                            |
| Mary Lou                          | McGregor   |                       |                  | Pediatric Ophthalmology Associates                     | Columbus, OH                             | Investigator                                            |                                                                                            |
| J. Ryan                           | McMurtrey  |                       |                  | Rocky Moutain Eye Care Associates                      | Salt Lake City, UT                       | Examiner                                                |                                                                                            |
| Kathryn B.                        | Miller     |                       |                  | Boston Children's Hospital                             | Boston, MA                               | Examiner                                                |                                                                                            |
| Preeti L.                         | Mokka      |                       |                  | Boston Children's Hospital                             | Boston, MA                               | Examiner                                                |                                                                                            |
| Jenifer                           | Montejo    |                       |                  | University of Alabama Birmingham School of Optometry   | Birmingham, AL                           | Coordinator                                             |                                                                                            |
| Beth A.                           | Morrell    |                       |                  | Rocky Moutain Eye Care Associates                      | Salt Lake City, UT                       | Coordinator                                             | Executive Committee                                                                        |
| Elyse                             | Nylin      |                       |                  | Illinois College of Optometry                          | Chicago, IL                              | Coordinator                                             |                                                                                            |
| Kimberly C.                       | Odom       |                       |                  | St Luke's Children's Ophthalmology                     | Boise, ID                                | Examiner                                                |                                                                                            |
| Gillaine                          | Ortiz      |                       |                  | The Jaeb Center for Health Research                    | Tampa, FL                                | Coordinating Center                                     |                                                                                            |
| Samantha A.                       | Parra      |                       |                  | Illinois College of Optometry                          | Chicago, IL                              | Examiner                                                |                                                                                            |
| Kyle J.                           | Perkins    |                       |                  | St Luke's Children's Ophthalmology                     | Boise, ID                                | Examiner                                                |                                                                                            |
| Larry W.                          | Plum       |                       |                  | St Luke's Children's Ophthalmology                     | Boise, ID                                | Coordinator                                             |                                                                                            |
| Ellen Fiona                       | Redenbo    |                       |                  | Casey Eye Institute Oregon Health & Science University | Portland, OR                             | Examiner                                                |                                                                                            |
| Julianne L.                       | Robinson   |                       |                  | The Jaeb Center for Health Research                    | Tampa, FL                                | Coordinating Center                                     |                                                                                            |
| Kathleen M.                       | Stutz      |                       |                  | The Jaeb Center for Health Research                    | Tampa, FL                                | Coordinating Center                                     |                                                                                            |
| Desirae R.                        | Sutherland |                       |                  | The Jaeb Center for Health Research                    | Tampa, FL                                | Coordinating Center                                     |                                                                                            |
| Mircea X.                         | Teodorescu |                       |                  | St Luke's Children's Ophthalmology                     | Boise, ID                                | Examiner                                                |                                                                                            |
| Lori L.                           | Torgensen  |                       |                  | St Luke's Children's Ophthalmology                     | Boise, ID                                | Examiner                                                |                                                                                            |
| David O.                          | Toro       |                       |                  | The Jaeb Center for Health Research                    | Tampa, FL                                | Coordinating Center                                     |                                                                                            |
| Phillip B.                        | Turner     |                       |                  | Casey Eye Institute Oregon Health & Science University | Portland, OR                             | Examiner                                                |                                                                                            |
| Natalie C.                        | Weil       |                       |                  | The Emory Eye Center                                   | Atlanta, GA                              | Investigator                                            |                                                                                            |
| Emily K.                          | Wiecek     |                       |                  | Boston Children's Hospital                             | Boston, MA                               | Investigator                                            |                                                                                            |
| Carsyn S.                         | Wilkins    |                       |                  | Vanderbilt University Medical Center                   | Nashville, TN                            | Coordinator                                             |                                                                                            |
| Victoria C.                       | Woodard    |                       |                  | The Jaeb Center for Health Research                    | Tampa, FL                                | Coordinating Center                                     |                                                                                            |
| Kevin M.                          | Woodruff   |                       |                  | Casey Eye Institute Oregon Health & Science University | Portland, OR                             | Examiner                                                |                                                                                            |
| Huizi                             | Yin        |                       |                  | Illinois College of Optometry                          | Chicago, IL                              | Investigator                                            |                                                                                            |
| Marika L.                         | Yumang     |                       |                  | Casey Eye Institute Oregon Health & Science University | Portland, OR                             | Examiner                                                |                                                                                            |
| Tomohiko                          | Yamada     |                       |                  |                                                        |                                          |                                                         | Planning Committee                                                                         |
| Noha S.                           | Ekdawi     |                       |                  |                                                        |                                          |                                                         | Planning Committee                                                                         |
| David A.                          | Leske      |                       |                  |                                                        |                                          |                                                         | Planning Committee                                                                         |

## Supplemental Online Content: Nonauthor Collaborators

\*Indicates required information. Only first name, last name, and suffix will appear in PubMed.

| *First Name and Middle Initial(s) | *Last Name    | *Suffix (eg, Jr, III) | Academic Degrees | Institution            | Location (city, state/province, country) | Role or Contribution, eg, chair, principal investigator | Group (if more than 1 Group listed in the byline) and/or Subgroup (eg, Steering Committee) |
|-----------------------------------|---------------|-----------------------|------------------|------------------------|------------------------------------------|---------------------------------------------------------|--------------------------------------------------------------------------------------------|
| David K.                          | Wallace       |                       |                  |                        |                                          |                                                         | Planning Committee, Executive Committee                                                    |
| Melanie L.                        | Christian     |                       |                  |                        |                                          |                                                         | Planning Committee                                                                         |
| Stephen R.                        | Glaser        |                       |                  |                        |                                          |                                                         | Planning Committee                                                                         |
| Eileen E.                         | Birch         |                       |                  |                        |                                          |                                                         | Planning Committee, Executive Committee                                                    |
| Angela M.                         | Chen          |                       |                  |                        |                                          |                                                         | Executive Committee                                                                        |
| Stephen P.                        | Christiansen  |                       |                  |                        |                                          |                                                         | Executive Committee                                                                        |
| Laura B.                          | Enyedi        |                       |                  |                        |                                          |                                                         | Executive Committee                                                                        |
| Donald F.                         | Everett       |                       |                  | National Eye Institute | Bethesda, MD                             | Program Officer                                         | Executive Committee                                                                        |
| Sharon F.                         | Freedman      |                       |                  |                        |                                          |                                                         | Executive Committee                                                                        |
| William V.                        | Good          |                       |                  |                        |                                          |                                                         | Executive Committee                                                                        |
| Erin C.                           | Jenewein      |                       |                  |                        |                                          |                                                         | Executive Committee                                                                        |
| Richard                           | London        |                       |                  |                        |                                          |                                                         | Executive Committee                                                                        |
| Vivian M.                         | Manh          |                       |                  |                        |                                          |                                                         | Executive Committee                                                                        |
| David G.                          | Morrison      |                       |                  |                        |                                          |                                                         | Executive Committee                                                                        |
| Stacy L.                          | Pineles       |                       |                  |                        |                                          |                                                         | Executive Committee                                                                        |
| Hantamalala                       | Ralay Ranaivo |                       |                  |                        |                                          |                                                         | Executive Committee                                                                        |
| Tawna L.                          | Roberts       |                       |                  |                        |                                          |                                                         | Executive Committee                                                                        |
| Scott T.                          | Ruark         |                       |                  |                        |                                          |                                                         | Executive Committee                                                                        |
| Bonita R.                         | Schweimler    |                       |                  |                        |                                          |                                                         | Executive Committee                                                                        |
| Jayne L.                          | Silver        |                       |                  |                        |                                          |                                                         | Executive Committee                                                                        |
| Donny W.                          | Suh           |                       |                  |                        |                                          |                                                         | Executive Committee                                                                        |
| Lisa C.                           | Verderber     |                       |                  |                        |                                          |                                                         | Executive Committee                                                                        |
| Marie                             | Diener-West   |                       |                  |                        |                                          |                                                         | Data Safety Monitoring Committee                                                           |
| John D.                           | Baker         |                       |                  |                        |                                          |                                                         | Data Safety Monitoring Committee                                                           |
| Barry                             | Davis         |                       |                  |                        |                                          |                                                         | Data Safety Monitoring Committee                                                           |
| Rosemary D.                       | Higgins       |                       |                  |                        |                                          |                                                         | Data Safety Monitoring Committee                                                           |
| Stephen W.                        | Poff          |                       |                  |                        |                                          |                                                         | Data Safety Monitoring Committee                                                           |

Supplemental Online Content: Nonauthor Collaborators

\*Indicates required information. Only first name, last name, and suffix will appear in PubMed.

| <b>*First Name and Middle Initial(s)</b> | <b>*Last Name</b> | <b>*Suffix (eg, Jr, III)</b> | Academic Degrees | Institution | Location (city, state/province, country) | Role or Contribution, eg, chair, principal investigator | Group (if more than 1 Group listed in the byline) and/or Subgroup (eg, Steering Committee) |
|------------------------------------------|-------------------|------------------------------|------------------|-------------|------------------------------------------|---------------------------------------------------------|--------------------------------------------------------------------------------------------|
| Richard A.                               | Saunders          |                              |                  |             |                                          |                                                         | Data Safety Monitoring Committee                                                           |
| Lawrence                                 | Tychsen           |                              |                  |             |                                          |                                                         | Data Safety Monitoring Committee                                                           |
