# Supplementary material
Source: PubMed Central journal article supplement (PMC10346510)
Supplement: jamaophthalmol-e232855-s005.pdf [file jamaophthalmol-e232855-s005.pdf]

## Data Sharing Statement

Repka. Low-Dose 0.01% Atropine Eye Drops vs Placebo for Myopia Control. *JAMA Ophthalmol.* Published July 13, 2023. doi:10.1001/jamaophthalmol.2023.2855

### Data

**Data available:** Yes

**Data types:** Deidentified participant data

**How to access data:** <https://public.jaeb.org/pedig/stdy>

**When available:** With publication

### Supporting Documents

**Document types:** None

### Additional Information

**Who can access the data:** anyone with a valid email address

**Types of analyses:** for any purpose

**Mechanisms of data availability:** without investigator support
